# Supplementary material for: Heterogeneous efflux pump expression underpins phenotypic resistance to antimicrobial peptides
Source: bioRxiv preprint, doi:10.1101/2024.04.22.590445, version 4 (2025-05-21)
Supplement: Data Set S2 [file 590445_file03.xlsx]

## Sheet: All Data
gene	Gene product	cluster	cell.class	logFC
accA	Acetyl-coenzyme A carboxylase carboxyl transferase subunit alpha	1	high	-0.556741
accA	Acetyl-coenzyme A carboxylase carboxyl transferase subunit alpha	1	1:1 mix	-0.407048
accA	Acetyl-coenzyme A carboxylase carboxyl transferase subunit alpha	1	low	-0.159724
accB	Biotin carboxyl carrier protein of acetyl-CoA carboxylase	2	low	0.539623
accB	Biotin carboxyl carrier protein of acetyl-CoA carboxylase	2	high	0.936242
accB	Biotin carboxyl carrier protein of acetyl-CoA carboxylase	2	1:1 mix	0.569609
accC	Biotin carboxylase	2	low	0.479668
accC	Biotin carboxylase	2	high	0.865892
accC	Biotin carboxylase	2	1:1 mix	0.498787
accD	Acetyl-coenzyme A carboxylase carboxyl transferase subunit beta	3	low	0.408291
accD	Acetyl-coenzyme A carboxylase carboxyl transferase subunit beta	3	high	1.47198
accD	Acetyl-coenzyme A carboxylase carboxyl transferase subunit beta	3	1:1 mix	0.826447
aceB	Malate synthase A	1	1:1 mix	0.115791
aceB	Malate synthase A	1	high	-0.251047
aceB	Malate synthase A	1	low	0.398656
aceF	Dihydrolipoyllysine-residue acetyltransferase component of pyruvate dehydrogenase complex	3	low	-0.0943473
aceF	Dihydrolipoyllysine-residue acetyltransferase component of pyruvate dehydrogenase complex	3	high	0.532956
aceF	Dihydrolipoyllysine-residue acetyltransferase component of pyruvate dehydrogenase complex	3	1:1 mix	0.216282
aceK	Isocitrate dehydrogenase kinase/phosphatase	2	high	-0.105393
aceK	Isocitrate dehydrogenase kinase/phosphatase	2	low	0.406826
aceK	Isocitrate dehydrogenase kinase/phosphatase	2	1:1 mix	0.118854
ackA	Acetate kinase	1	1:1 mix	-0.432835
ackA	Acetate kinase	1	high	-0.997696
ackA	Acetate kinase	1	low	-0.121499
acnB	Aconitate hydratase B	2	high	0.307843
acnB	Aconitate hydratase B	2	low	0.480229
acnB	Aconitate hydratase B	2	1:1 mix	0.274284
acpH	Acyl carrier protein phosphodiesterase	1	1:1 mix	-0.468088
acpH	Acyl carrier protein phosphodiesterase	1	high	-0.993065
acpH	Acyl carrier protein phosphodiesterase	1	low	-0.22519
acpP	Acyl carrier protein	1	1:1 mix	-0.373576
acpP	Acyl carrier protein	1	high	-0.426077
acpP	Acyl carrier protein	1	low	-0.316927
acpS	Holo-[acyl-carrier-protein] synthase	1	1:1 mix	-0.418464
acpS	Holo-[acyl-carrier-protein] synthase	1	high	-1.04755
acpS	Holo-[acyl-carrier-protein] synthase	1	low	-0.2187
acrB	Multidrug efflux pump subunit AcrB	2	low	0.164257
acrB	Multidrug efflux pump subunit AcrB	2	high	0.571172
acrB	Multidrug efflux pump subunit AcrB	2	1:1 mix	0.275872
ada	Bifunctional transcriptional activator/DNA repair enzyme Ada	1	1:1 mix	-0.549847
ada	Bifunctional transcriptional activator/DNA repair enzyme Ada	1	high	-0.777872
ada	Bifunctional transcriptional activator/DNA repair enzyme Ada	1	low	-0.538569
add	Adenosine deaminase	2	high	0.392472
add	Adenosine deaminase	2	low	0.810664
add	Adenosine deaminase	2	1:1 mix	0.758854
adhP	Alcohol dehydrogenase, propanol-preferring	3	low	-0.146275
adhP	Alcohol dehydrogenase, propanol-preferring	3	high	0.364193
adhP	Alcohol dehydrogenase, propanol-preferring	3	1:1 mix	0.0608472
aegA	Putative oxidoreductase AegA	3	low	0.292982
aegA	Putative oxidoreductase AegA	3	high	1.00424
aegA	Putative oxidoreductase AegA	3	1:1 mix	0.829368
agp	Glucose-1-phosphatase	1	1:1 mix	-0.506787
agp	Glucose-1-phosphatase	1	high	-0.629436
agp	Glucose-1-phosphatase	1	low	-0.323593
ahpC	Alkyl hydroperoxide reductase C	2	low	0.0170642
ahpC	Alkyl hydroperoxide reductase C	2	high	0.604092
ahpC	Alkyl hydroperoxide reductase C	2	1:1 mix	0.119951
ahpF	Alkyl hydroperoxide reductase subunit F	2	low	0.17964
ahpF	Alkyl hydroperoxide reductase subunit F	2	high	0.80644
ahpF	Alkyl hydroperoxide reductase subunit F	2	1:1 mix	0.271412
ahr	Aldehyde reductase Ahr	1	1:1 mix	-0.0950783
ahr	Aldehyde reductase Ahr	1	high	-0.458842
ahr	Aldehyde reductase Ahr	1	low	-0.218849
alaE	L-alanine exporter AlaE	3	low	-0.157754
alaE	L-alanine exporter AlaE	3	high	1.88617
alaE	L-alanine exporter AlaE	3	1:1 mix	0.999596
alaS	Alanine--tRNA ligase	2	low	0.595414
alaS	Alanine--tRNA ligase	2	high	0.678073
alaS	Alanine--tRNA ligase	2	1:1 mix	0.562823
aldB	Aldehyde dehydrogenase B	4	high	-1.6809
aldB	Aldehyde dehydrogenase B	4	low	-0.356235
aldB	Aldehyde dehydrogenase B	4	1:1 mix	-0.814912
alkB	Alpha-ketoglutarate-dependent dioxygenase AlkB	4	high	-1.49011
alkB	Alpha-ketoglutarate-dependent dioxygenase AlkB	4	low	-0.686033
alkB	Alpha-ketoglutarate-dependent dioxygenase AlkB	4	1:1 mix	-0.742116
allA	Ureidoglycolate lyase	5	low	-1.50955
allA	Ureidoglycolate lyase	5	high	-0.444706
allA	Ureidoglycolate lyase	5	1:1 mix	-1.7911
allR	HTH-type transcriptional repressor AllR	3	low	-0.0967585
allR	HTH-type transcriptional repressor AllR	3	high	1.20057
allR	HTH-type transcriptional repressor AllR	3	1:1 mix	0.548274
alsR	HTH-type transcriptional regulator RpiR	2	high	0.314155
alsR	HTH-type transcriptional regulator RpiR	2	low	0.794689
alsR	HTH-type transcriptional regulator RpiR	2	1:1 mix	0.380093
alx	Putative membrane-bound redox modulator Alx	3	low	-0.118696
alx	Putative membrane-bound redox modulator Alx	3	high	1.71533
alx	Putative membrane-bound redox modulator Alx	3	1:1 mix	1.07341
amiA	N-acetylmuramoyl-L-alanine amidase AmiA	3	low	0.0519841
amiA	N-acetylmuramoyl-L-alanine amidase AmiA	3	high	1.50207
amiA	N-acetylmuramoyl-L-alanine amidase AmiA	3	1:1 mix	0.642108
amiB	N-acetylmuramoyl-L-alanine amidase AmiB	2	low	0.291648
amiB	N-acetylmuramoyl-L-alanine amidase AmiB	2	high	0.435916
amiB	N-acetylmuramoyl-L-alanine amidase AmiB	2	1:1 mix	0.200875
amiC	N-acetylmuramoyl-L-alanine amidase AmiC	3	low	0.678533
amiC	N-acetylmuramoyl-L-alanine amidase AmiC	3	high	1.4949
amiC	N-acetylmuramoyl-L-alanine amidase AmiC	3	1:1 mix	1.04588
amn	AMP nucleosidase	1	1:1 mix	-0.195062
amn	AMP nucleosidase	1	high	-0.412638
amn	AMP nucleosidase	1	low	-0.0884892
ampC	Beta-lactamase	4	high	-0.882257
ampC	Beta-lactamase	4	low	-0.0960963
ampC	Beta-lactamase	4	1:1 mix	-0.0173415
ampG	Anhydromuropeptide permease	2	low	0.14432
ampG	Anhydromuropeptide permease	2	high	1.08836
ampG	Anhydromuropeptide permease	2	1:1 mix	0.217607
ampH	D-alanyl-D-alanine-carboxypeptidase/endopeptidase AmpH	3	low	0.457061
ampH	D-alanyl-D-alanine-carboxypeptidase/endopeptidase AmpH	3	high	0.559862
ampH	D-alanyl-D-alanine-carboxypeptidase/endopeptidase AmpH	3	1:1 mix	0.224153
anmK	Anhydro-N-acetylmuramic acid kinase	3	low	0.226756
anmK	Anhydro-N-acetylmuramic acid kinase	3	high	1.3426
anmK	Anhydro-N-acetylmuramic acid kinase	3	1:1 mix	0.766474
ansB	L-asparaginase 2	1	1:1 mix	-0.505006
ansB	L-asparaginase 2	1	high	-0.66312
ansB	L-asparaginase 2	1	low	-0.244107
apaG	Protein ApaG	1	1:1 mix	-0.213847
apaG	Protein ApaG	1	high	-0.701603
apaG	Protein ApaG	1	low	-0.111689
apaH	Bis(5'-nucleosyl)-tetraphosphatase [symmetrical]	1	1:1 mix	-0.286202
apaH	Bis(5'-nucleosyl)-tetraphosphatase [symmetrical]	1	high	-0.498499
apaH	Bis(5'-nucleosyl)-tetraphosphatase [symmetrical]	1	low	-0.0998058
aphA	Class B acid phosphatase	1	1:1 mix	-0.542825
aphA	Class B acid phosphatase	1	high	-1.15211
aphA	Class B acid phosphatase	1	low	-0.0328755
appA	Periplasmic AppA protein	3	low	0.302715
appA	Periplasmic AppA protein	3	high	1.91762
appA	Periplasmic AppA protein	3	1:1 mix	1.14436
appY	HTH-type transcriptional regulator AppY	4	high	-1.05464
appY	HTH-type transcriptional regulator AppY	4	low	-0.505813
appY	HTH-type transcriptional regulator AppY	4	1:1 mix	-0.928905
apt	Adenine phosphoribosyltransferase	3	high	0.523303
apt	Adenine phosphoribosyltransferase	3	low	0.794621
apt	Adenine phosphoribosyltransferase	3	1:1 mix	0.100225
araC	Arabinose operon regulatory protein	3	low	0.395176
araC	Arabinose operon regulatory protein	3	high	2.25125
araC	Arabinose operon regulatory protein	3	1:1 mix	1.22803
arcA	Aerobic respiration control protein ArcA	3	low	-0.213678
arcA	Aerobic respiration control protein ArcA	3	high	0.446148
arcA	Aerobic respiration control protein ArcA	3	1:1 mix	0.124969
argP	HTH-type transcriptional regulator ArgP	2	low	0.396791
argP	HTH-type transcriptional regulator ArgP	2	high	0.597825
argP	HTH-type transcriptional regulator ArgP	2	1:1 mix	0.408251
argS	Arginine--tRNA ligase	2	low	0.257653
argS	Arginine--tRNA ligase	2	high	0.410943
argS	Arginine--tRNA ligase	2	1:1 mix	0.377877
argT	Lysine/arginine/ornithine-binding periplasmic protein	1	1:1 mix	-0.22096
argT	Lysine/arginine/ornithine-binding periplasmic protein	1	high	-0.631315
argT	Lysine/arginine/ornithine-binding periplasmic protein	1	low	0.379421
ariR	Probable two-component-system connector protein AriR	3	low	-0.0972298
ariR	Probable two-component-system connector protein AriR	3	high	2.18836
ariR	Probable two-component-system connector protein AriR	3	1:1 mix	1.20955
arnB	UDP-4-amino-4-deoxy-L-arabinose--oxoglutarate aminotransferase	1	1:1 mix	-0.256068
arnB	UDP-4-amino-4-deoxy-L-arabinose--oxoglutarate aminotransferase	1	high	-0.864377
arnB	UDP-4-amino-4-deoxy-L-arabinose--oxoglutarate aminotransferase	1	low	-0.160133
arnF	Probable 4-amino-4-deoxy-L-arabinose-phosphoundecaprenol flippase subunit ArnF	4	high	-1.1717
arnF	Probable 4-amino-4-deoxy-L-arabinose-phosphoundecaprenol flippase subunit ArnF	4	low	0.169365
arnF	Probable 4-amino-4-deoxy-L-arabinose-phosphoundecaprenol flippase subunit ArnF	4	1:1 mix	-0.797135
arnT	Undecaprenyl phosphate-alpha-4-amino-4-deoxy-L-arabinose arabinosyl transferase	1	1:1 mix	-0.205836
arnT	Undecaprenyl phosphate-alpha-4-amino-4-deoxy-L-arabinose arabinosyl transferase	1	high	-0.789583
arnT	Undecaprenyl phosphate-alpha-4-amino-4-deoxy-L-arabinose arabinosyl transferase	1	low	0.1124
aroA	3-phosphoshikimate 1-carboxyvinyltransferase	2	high	0.417789
aroA	3-phosphoshikimate 1-carboxyvinyltransferase	2	low	0.826163
aroA	3-phosphoshikimate 1-carboxyvinyltransferase	2	1:1 mix	0.499896
aroE	Shikimate dehydrogenase (NADP(+))	1	1:1 mix	-0.801915
aroE	Shikimate dehydrogenase (NADP(+))	1	high	-1.21001
aroE	Shikimate dehydrogenase (NADP(+))	1	low	-0.569666
aroF	Phospho-2-dehydro-3-deoxyheptonate aldolase, Tyr-sensitive	3	low	-0.373809
aroF	Phospho-2-dehydro-3-deoxyheptonate aldolase, Tyr-sensitive	3	high	1.11119
aroF	Phospho-2-dehydro-3-deoxyheptonate aldolase, Tyr-sensitive	3	1:1 mix	0.568768
aroH	Phospho-2-dehydro-3-deoxyheptonate aldolase, Trp-sensitive	1	1:1 mix	-0.193533
aroH	Phospho-2-dehydro-3-deoxyheptonate aldolase, Trp-sensitive	1	high	-0.337824
aroH	Phospho-2-dehydro-3-deoxyheptonate aldolase, Trp-sensitive	1	low	-0.00378848
aroP	Aromatic amino acid transport protein AroP	3	low	-0.298164
aroP	Aromatic amino acid transport protein AroP	3	high	1.03095
aroP	Aromatic amino acid transport protein AroP	3	1:1 mix	0.538155
artP	Arginine transport ATP-binding protein ArtP	1	1:1 mix	0.177401
artP	Arginine transport ATP-binding protein ArtP	1	high	-0.506421
artP	Arginine transport ATP-binding protein ArtP	1	low	0.39366
artQ	Arginine ABC transporter permease protein ArtQ	1	1:1 mix	-0.111231
artQ	Arginine ABC transporter permease protein ArtQ	1	high	-0.870437
artQ	Arginine ABC transporter permease protein ArtQ	1	low	0.18619
ascB	6-phospho-beta-glucosidase AscB	3	low	-0.285885
ascB	6-phospho-beta-glucosidase AscB	3	high	0.716074
ascB	6-phospho-beta-glucosidase AscB	3	1:1 mix	0.28651
asmA	Protein AsmA	2	low	0.292799
asmA	Protein AsmA	2	high	0.47906
asmA	Protein AsmA	2	1:1 mix	0.24091
asnA	Aspartate--ammonia ligase	5	low	-0.631542
asnA	Aspartate--ammonia ligase	5	high	4.39896
asnA	Aspartate--ammonia ligase	5	1:1 mix	3.32492
asnB	Asparagine synthetase B [glutamine-hydrolyzing]	3	low	0.428953
asnB	Asparagine synthetase B [glutamine-hydrolyzing]	3	high	2.80871
asnB	Asparagine synthetase B [glutamine-hydrolyzing]	3	1:1 mix	1.86106
asnC	Regulatory protein AsnC	3	low	-0.085992
asnC	Regulatory protein AsnC	3	high	0.95722
asnC	Regulatory protein AsnC	3	1:1 mix	0.524474
asnS	Asparagine--tRNA ligase	2	low	0.416716
asnS	Asparagine--tRNA ligase	2	high	0.92002
asnS	Asparagine--tRNA ligase	2	1:1 mix	0.704742
aspS	Aspartate--tRNA ligase	2	high	0.231994
aspS	Aspartate--tRNA ligase	2	low	0.332396
aspS	Aspartate--tRNA ligase	2	1:1 mix	0.337575
astE	Succinylglutamate desuccinylase	4	high	-1.42804
astE	Succinylglutamate desuccinylase	4	low	-1.27715
astE	Succinylglutamate desuccinylase	4	1:1 mix	-1.56808
atpA	ATP synthase subunit alpha	3	low	0.567929
atpA	ATP synthase subunit alpha	3	high	1.32738
atpA	ATP synthase subunit alpha	3	1:1 mix	0.816448
atpB	ATP synthase subunit a	3	low	0.728851
atpB	ATP synthase subunit a	3	high	1.37787
atpB	ATP synthase subunit a	3	1:1 mix	1.0241
atpC	ATP synthase subunit beta	3	low	0.76013
atpC	ATP synthase subunit beta	3	high	1.71127
atpC	ATP synthase subunit beta	3	1:1 mix	1.30247
atpD	ATP synthase subunit c	3	low	0.661294
atpD	ATP synthase subunit c	3	high	1.43792
atpD	ATP synthase subunit c	3	1:1 mix	0.982828
atpE	ATP synthase epsilon chain	3	low	0.830609
atpE	ATP synthase epsilon chain	3	high	1.51489
atpE	ATP synthase epsilon chain	3	1:1 mix	0.869239
atpF	ATP synthase subunit b	3	low	0.743699
atpF	ATP synthase subunit b	3	high	1.48753
atpF	ATP synthase subunit b	3	1:1 mix	1.00896
atpG	ATP synthase gamma chain	3	low	0.658251
atpG	ATP synthase gamma chain	3	high	1.26184
atpG	ATP synthase gamma chain	3	1:1 mix	0.792875
atpH	ATP synthase subunit delta	3	low	0.920395
atpH	ATP synthase subunit delta	3	high	1.45083
atpH	ATP synthase subunit delta	3	1:1 mix	0.863455
atpI	ATP synthase protein I	3	low	1.03007
atpI	ATP synthase protein I	3	high	1.39161
atpI	ATP synthase protein I	3	1:1 mix	0.929679
avtA	Valine--pyruvate aminotransferase	1	1:1 mix	-0.000441357
avtA	Valine--pyruvate aminotransferase	1	high	-0.38598
avtA	Valine--pyruvate aminotransferase	1	low	0.282745
azoR	FMN-dependent NADH:quinone oxidoreductase	5	high	2.7159
azoR	FMN-dependent NADH:quinone oxidoreductase	5	low	2.81121
azoR	FMN-dependent NADH:quinone oxidoreductase	5	1:1 mix	3.51053
bacA	Undecaprenyl-diphosphatase	2	low	0.0427727
bacA	Undecaprenyl-diphosphatase	2	high	0.686762
bacA	Undecaprenyl-diphosphatase	2	1:1 mix	0.314017
bamB	Outer membrane protein assembly factor BamB	2	low	0.177036
bamB	Outer membrane protein assembly factor BamB	2	high	0.369205
bamB	Outer membrane protein assembly factor BamB	2	1:1 mix	0.0946898
bamC	Outer membrane protein assembly factor BamC	2	low	0.344622
bamC	Outer membrane protein assembly factor BamC	2	high	0.545279
bamC	Outer membrane protein assembly factor BamC	2	1:1 mix	0.24675
bamD	Outer membrane protein assembly factor BamD	2	high	0.155515
bamD	Outer membrane protein assembly factor BamD	2	low	0.363373
bamD	Outer membrane protein assembly factor BamD	2	1:1 mix	0.317597
bamE	Outer membrane protein assembly factor BamE	2	low	0.228358
bamE	Outer membrane protein assembly factor BamE	2	high	0.746768
bamE	Outer membrane protein assembly factor BamE	2	1:1 mix	0.302604
bax	Protein bax	3	low	0.719125
bax	Protein bax	3	high	1.83908
bax	Protein bax	3	1:1 mix	1.11163
bcsC	Endoglucanase	1	1:1 mix	-0.356263
bcsC	Cellulose synthase operon protein C	1	high	-0.618601
bcsC	Endoglucanase	1	low	-0.288949
bcsE	Cellulose synthase operon protein C	1	1:1 mix	-0.192269
bcsE	Endoglucanase	1	high	-0.743153
bcsE	Cellulose synthase operon protein C	1	low	-0.0895776
bcsQ	Cyclic di-GMP binding protein BcsE	4	high	-2.1293
bcsQ	Cyclic di-GMP binding protein BcsE	4	low	-1.34003
bcsQ	Cyclic di-GMP binding protein BcsE	4	1:1 mix	-1.34546
bepA	Putative cellulose biosynthesis protein BcsQ	2	high	0.311501
bepA	Putative cellulose biosynthesis protein BcsQ	2	low	0.557889
bepA	Putative cellulose biosynthesis protein BcsQ	2	1:1 mix	0.414308
betA	Beta-barrel assembly-enhancing protease	3	high	0.400757
betA	Beta-barrel assembly-enhancing protease	3	low	1.37513
betA	Beta-barrel assembly-enhancing protease	3	1:1 mix	0.38915
betB	Oxygen-dependent choline dehydrogenase	3	high	0.998418
betB	Oxygen-dependent choline dehydrogenase	3	low	1.22672
betB	Oxygen-dependent choline dehydrogenase	3	1:1 mix	0.884776
betI	Betaine aldehyde dehydrogenase	3	low	1.47517
betI	Betaine aldehyde dehydrogenase	3	high	1.59255
betI	Betaine aldehyde dehydrogenase	3	1:1 mix	1.22024
bfd	HTH-type transcriptional regulator BetI	4	high	-1.33236
bfd	HTH-type transcriptional regulator BetI	4	low	-0.733626
bfd	HTH-type transcriptional regulator BetI	4	1:1 mix	-0.954745
bfr	Bacterioferritin-associated ferredoxin	4	high	-1.5031
bfr	Bacterioferritin-associated ferredoxin	4	low	-0.592681
bfr	Bacterioferritin-associated ferredoxin	4	1:1 mix	-0.766226
bglA	Bacterioferritin	3	low	0.617723
bglA	Bacterioferritin	3	high	1.76533
bglA	Bacterioferritin	3	1:1 mix	1.17137
bioC	6-phospho-beta-glucosidase BglA	3	low	0.979821
bioC	6-phospho-beta-glucosidase BglA	3	high	2.61258
bioC	6-phospho-beta-glucosidase BglA	3	1:1 mix	1.95129
bioD	Malonyl-[acyl-carrier protein] O-methyltransferase	5	low	1.44471
bioD	Malonyl-[acyl-carrier protein] O-methyltransferase	5	high	2.29868
bioD	Malonyl-[acyl-carrier protein] O-methyltransferase	5	1:1 mix	2.00772
bisC	Biotin sulfoxide reductase	2	low	0.254718
bisC	Biotin sulfoxide reductase	2	high	0.501403
bisC	Biotin sulfoxide reductase	2	1:1 mix	0.255029
blc	Outer membrane lipoprotein Blc	1	1:1 mix	-0.552648
blc	Outer membrane lipoprotein Blc	1	low	-0.61038
blc	Outer membrane lipoprotein Blc	1	high	-0.494626
bluF	Blue light- and temperature-regulated antirepressor BluF	1	1:1 mix	-0.388018
bluF	Blue light- and temperature-regulated antirepressor BluF	1	high	-0.870678
bluF	Blue light- and temperature-regulated antirepressor BluF	1	low	-0.227427
bolA	DNA-binding transcriptional regulator BolA	1	1:1 mix	-0.43541
bolA	DNA-binding transcriptional regulator BolA	1	low	-0.772097
bolA	DNA-binding transcriptional regulator BolA	1	high	-0.391433
brnQ	Branched-chain amino acid transport system 2 carrier protein	1	1:1 mix	-0.121107
brnQ	Branched-chain amino acid transport system 2 carrier protein	1	high	-0.36724
brnQ	Branched-chain amino acid transport system 2 carrier protein	1	low	0.00399468
bssR	Biofilm regulator BssR	3	low	-0.308952
bssR	Biofilm regulator BssR	3	high	2.21117
bssR	Biofilm regulator BssR	3	1:1 mix	1.08109
bssS	Biofilm regulator BssS	3	low	-0.979629
bssS	Biofilm regulator BssS	3	high	0.325733
bssS	Biofilm regulator BssS	3	1:1 mix	-0.161587
btuD	Vitamin B12 import ATP-binding protein BtuD	1	1:1 mix	0.182283
btuD	Vitamin B12 import ATP-binding protein BtuD	1	high	-0.630556
btuD	Vitamin B12 import ATP-binding protein BtuD	1	low	0.21073
btuE	Thioredoxin/glutathione peroxidase BtuE	1	1:1 mix	0.114841
btuE	Thioredoxin/glutathione peroxidase BtuE	1	high	-0.711677
btuE	Thioredoxin/glutathione peroxidase BtuE	1	low	0.205753
btuR	Corrinoid adenosyltransferase	3	low	0.16617
btuR	Corrinoid adenosyltransferase	3	high	0.788143
btuR	Corrinoid adenosyltransferase	3	1:1 mix	0.683887
can	Carbonic anhydrase 2	2	high	0.134463
can	Carbonic anhydrase 2	2	low	0.71419
can	Carbonic anhydrase 2	2	1:1 mix	0.386301
cbdA	Cytochrome bd-II ubiquinol oxidase subunit 1	3	low	0.421821
cbdA	Cytochrome bd-II ubiquinol oxidase subunit 1	3	high	2.66601
cbdA	Cytochrome bd-II ubiquinol oxidase subunit 1	3	1:1 mix	1.49657
cbdB	Cytochrome bd-II ubiquinol oxidase subunit 2	3	low	0.531094
cbdB	Cytochrome bd-II ubiquinol oxidase subunit 2	3	high	2.76963
cbdB	Cytochrome bd-II ubiquinol oxidase subunit 2	3	1:1 mix	1.72168
cbl	Protein MalY	1	1:1 mix	-0.0151186
cbl	HTH-type transcriptional regulator cbl	1	high	-0.885606
cbl	Protein MalY	1	low	0.0535984
cbpA	Curved DNA-binding protein	1	1:1 mix	-0.398445
cbpA	Curved DNA-binding protein	1	high	-0.669621
cbpA	Curved DNA-binding protein	1	low	-0.402695
cbpM	Chaperone modulatory protein CbpM	1	1:1 mix	-0.438887
cbpM	Chaperone modulatory protein CbpM	1	high	-0.75667
cbpM	Chaperone modulatory protein CbpM	1	low	-0.407145
cca	Multifunctional CCA protein	1	1:1 mix	-0.082175
cca	Multifunctional CCA protein	1	high	-0.509069
cca	Multifunctional CCA protein	1	low	0.00820873
ccmA	Cytochrome c biogenesis ATP-binding export protein CcmA	2	low	0.45025
ccmA	Cytochrome c biogenesis ATP-binding export protein CcmA	2	high	1.00942
ccmA	Cytochrome c biogenesis ATP-binding export protein CcmA	2	1:1 mix	0.89192
ccmF	Cytochrome c-type biogenesis protein CcmF	3	low	0.896642
ccmF	Cytochrome c-type biogenesis protein CcmF	3	high	1.12686
ccmF	Cytochrome c-type biogenesis protein CcmF	3	1:1 mix	0.567025
ccmH	Cytochrome c-type biogenesis protein CcmH	3	low	-0.048898
ccmH	Cytochrome c-type biogenesis protein CcmH	3	high	1.64171
ccmH	Cytochrome c-type biogenesis protein CcmH	3	1:1 mix	0.600974
cdaR	Carbohydrate diacid regulator	3	low	0.264211
cdaR	Carbohydrate diacid regulator	3	high	1.27119
cdaR	Carbohydrate diacid regulator	3	1:1 mix	0.899747
cdd	Cytidine deaminase	1	1:1 mix	-0.384862
cdd	Cytidine deaminase	1	high	-0.722345
cdd	Cytidine deaminase	1	low	-0.282229
cdh	CDP-diacylglycerol pyrophosphatase	4	high	-1.54211
cdh	CDP-diacylglycerol pyrophosphatase	4	low	-0.984836
cdh	CDP-diacylglycerol pyrophosphatase	4	1:1 mix	-1.10232
cfa	Cyclopropane-fatty-acyl-phospholipid synthase	1	1:1 mix	0.0314498
cfa	Cyclopropane-fatty-acyl-phospholipid synthase	1	high	-0.40764
cfa	Cyclopropane-fatty-acyl-phospholipid synthase	1	low	0.0443508
chaA	Sodium-potassium/proton antiporter ChaA	3	low	0.615546
chaA	Sodium-potassium/proton antiporter ChaA	3	high	3.67428
chaA	Sodium-potassium/proton antiporter ChaA	3	1:1 mix	2.28685
chaC	Glutathione-specific gamma-glutamylcyclotransferase	3	low	-0.547478
chaC	Glutathione-specific gamma-glutamylcyclotransferase	3	high	-0.176067
chaC	Glutathione-specific gamma-glutamylcyclotransferase	3	1:1 mix	-0.373826
cheR	Chemotaxis protein methyltransferase	3	low	0.533316
cheR	Chemotaxis protein methyltransferase	3	high	1.47901
cheR	Chemotaxis protein methyltransferase	3	1:1 mix	0.923267
chpB	Endoribonuclease toxin ChpB	1	1:1 mix	-0.540508
chpB	Endoribonuclease toxin ChpB	1	low	-0.615809
chpB	Endoribonuclease toxin ChpB	1	high	-0.483915
chrR	Quinone reductase	2	low	0.288123
chrR	Quinone reductase	2	high	0.761416
chrR	Quinone reductase	2	1:1 mix	0.426482
citT	Citrate/succinate antiporter	3	low	-0.0190045
citT	Citrate/succinate antiporter	3	high	1.53102
citT	Citrate/succinate antiporter	3	1:1 mix	0.858516
clcA	H(+)/Cl(-) exchange transporter ClcA	1	1:1 mix	-0.53499
clcA	H(+)/Cl(-) exchange transporter ClcA	1	high	-0.856996
clcA	H(+)/Cl(-) exchange transporter ClcA	1	low	-0.478309
clpA	ATP-dependent Clp protease ATP-binding subunit ClpA	2	low	0.371127
clpA	ATP-dependent Clp protease ATP-binding subunit ClpA	2	high	1.15095
clpA	ATP-dependent Clp protease ATP-binding subunit ClpA	2	1:1 mix	0.737135
clpB	Chaperone protein ClpB	3	low	-0.073317
clpB	Chaperone protein ClpB	3	high	1.96281
clpB	Chaperone protein ClpB	3	1:1 mix	1.32895
clsB	Cardiolipin synthase B	2	low	0.20759
clsB	Cardiolipin synthase B	2	high	1.1244
clsB	Cardiolipin synthase B	2	1:1 mix	0.460403
cmk	4-diphosphocytidyl-2-C-methyl-D-erythritol kinase	2	low	0.138102
cmk	Cytidylate kinase	2	high	0.807131
cmk	4-diphosphocytidyl-2-C-methyl-D-erythritol kinase	2	1:1 mix	0.366175
cmoA	Carboxy-S-adenosyl-L-methionine synthase	1	1:1 mix	-0.275239
cmoA	Carboxy-S-adenosyl-L-methionine synthase	1	high	-0.612301
cmoA	Carboxy-S-adenosyl-L-methionine synthase	1	low	-0.203445
cobB	NAD-dependent protein deacylase	1	1:1 mix	0.077965
cobB	NAD-dependent protein deacylase	1	high	-0.552156
cobB	NAD-dependent protein deacylase	1	low	-0.0518125
cof	HMP-PP phosphatase	2	low	0.195864
cof	HMP-PP phosphatase	2	high	0.787828
cof	HMP-PP phosphatase	2	1:1 mix	0.610375
copA	Copper-exporting P-type ATPase	3	low	0.303681
copA	Copper-exporting P-type ATPase	3	high	2.07313
copA	Copper-exporting P-type ATPase	3	1:1 mix	1.07992
corA	Magnesium transport protein CorA	2	low	0.106699
corA	Magnesium transport protein CorA	2	high	0.578767
corA	Magnesium transport protein CorA	2	1:1 mix	0.305736
cpdB	2',3'-cyclic-nucleotide 2'-phosphodiesterase/3'-nucleotidase	1	1:1 mix	-0.243892
cpdB	2',3'-cyclic-nucleotide 2'-phosphodiesterase/3'-nucleotidase	1	high	-0.575508
cpdB	2',3'-cyclic-nucleotide 2'-phosphodiesterase/3'-nucleotidase	1	low	0.0459967
cpxP	Periplasmic protein CpxP	5	low	-0.0396751
cpxP	Periplasmic protein CpxP	5	high	7.28175
cpxP	Periplasmic protein CpxP	5	1:1 mix	5.90994
cpxR	Transcriptional regulatory protein CpxR	1	1:1 mix	-0.0680557
cpxR	Transcriptional regulatory protein CpxR	1	high	-0.354464
cpxR	Transcriptional regulatory protein CpxR	1	low	-0.0811629
cra	Catabolite repressor/activator	3	low	0.460935
cra	Catabolite repressor/activator	3	high	0.565579
cra	Catabolite repressor/activator	3	1:1 mix	0.118017
crp	cAMP-activated global transcriptional regulator CRP	2	low	0.203828
crp	cAMP-activated global transcriptional regulator CRP	2	high	0.328099
crp	cAMP-activated global transcriptional regulator CRP	2	1:1 mix	0.203721
crr	PTS system glucose-specific EIIA component	3	low	-0.395966
crr	PTS system glucose-specific EIIA component	3	high	0.0533955
crr	PTS system glucose-specific EIIA component	3	1:1 mix	-0.121053
csgC	Curli assembly protein CsgC	4	high	-2.49195
csgC	Curli assembly protein CsgC	4	low	-1.27251
csgC	Curli assembly protein CsgC	4	1:1 mix	-0.82462
csgD	CsgBAC operon transcriptional regulatory protein	4	high	-1.76877
csgD	CsgBAC operon transcriptional regulatory protein	4	low	-0.464953
csgD	CsgBAC operon transcriptional regulatory protein	4	1:1 mix	-1.34913
csgE	Curli production assembly/transport component CsgE	4	high	-2.1212
csgE	Curli production assembly/transport component CsgE	4	low	-0.44996
csgE	Curli production assembly/transport component CsgE	4	1:1 mix	-1.6816
csgF	Curli production assembly/transport component CsgF	4	high	-2.42739
csgF	Curli production assembly/transport component CsgF	4	low	-0.536557
csgF	Curli production assembly/transport component CsgF	4	1:1 mix	-1.65461
csgG	Curli production assembly/transport component CsgG	4	high	-1.60294
csgG	Curli production assembly/transport component CsgG	4	low	-0.523009
csgG	Curli production assembly/transport component CsgG	4	1:1 mix	-1.27232
csiE	Stationary phase-inducible protein CsiE	1	1:1 mix	-0.320425
csiE	Stationary phase-inducible protein CsiE	1	high	-0.779798
csiE	Stationary phase-inducible protein CsiE	1	low	0.0880821
csiR	HTH-type transcriptional repressor GlaR	1	1:1 mix	-0.421114
csiR	HTH-type transcriptional repressor GlaR	1	high	-0.633885
csiR	HTH-type transcriptional repressor GlaR	1	low	-0.273811
cspA	Cold shock protein CspA	1	1:1 mix	-0.665764
cspA	Cold shock protein CspA	1	high	-1.23767
cspA	Cold shock protein CspA	1	low	-0.693661
cspB	Cold shock-like protein CspB	4	high	-1.6439
cspB	Cold shock-like protein CspB	4	low	-0.683408
cspB	Cold shock-like protein CspB	4	1:1 mix	-1.16308
cspD	Cold shock-like protein CspD	3	low	-0.406792
cspD	Cold shock-like protein CspD	3	high	1.26392
cspD	Cold shock-like protein CspD	3	1:1 mix	0.445654
cspE	Cold shock-like protein CspE	2	low	0.398009
cspE	Cold shock-like protein CspE	2	high	1.1347
cspE	Cold shock-like protein CspE	2	1:1 mix	0.613221
cspI	Cold shock-like protein CspG	1	1:1 mix	-0.902857
cspI	Cold shock-like protein CspI	1	high	-1.18668
cspI	Cold shock-like protein CspG	1	low	-1.01662
csrA	Carbon storage regulator	1	1:1 mix	-0.605408
csrA	Carbon storage regulator	1	low	-0.848997
csrA	Carbon storage regulator	1	high	-0.832341
cueR	HTH-type transcriptional regulator CueR	2	low	0.283118
cueR	HTH-type transcriptional regulator CueR	2	high	0.689328
cueR	HTH-type transcriptional regulator CueR	2	1:1 mix	0.498783
curA	NADPH-dependent curcumin reductase	1	1:1 mix	-0.255764
curA	NADPH-dependent curcumin reductase	1	high	-0.953018
curA	NADPH-dependent curcumin reductase	1	low	-0.24957
cutA	Divalent-cation tolerance protein CutA	1	1:1 mix	-0.12101
cutA	Divalent-cation tolerance protein CutA	1	high	-0.509097
cutA	Divalent-cation tolerance protein CutA	1	low	0.179437
cydB	Cytochrome bd-I ubiquinol oxidase subunit 2	3	low	-0.0951215
cydB	Cytochrome bd-I ubiquinol oxidase subunit 2	3	high	0.732701
cydB	Cytochrome bd-I ubiquinol oxidase subunit 2	3	1:1 mix	0.288072
cydC	ATP-binding/permease protein CydC	3	high	0.672743
cydC	ATP-binding/permease protein CydC	3	low	0.74871
cydC	ATP-binding/permease protein CydC	3	1:1 mix	0.343123
cydD	ATP-binding/permease protein CydD	2	high	0.458233
cydD	ATP-binding/permease protein CydD	2	low	0.58322
cydD	ATP-binding/permease protein CydD	2	1:1 mix	0.549177
cyoA	Cytochrome bo(3) ubiquinol oxidase subunit 2	2	low	0.479301
cyoA	Cytochrome bo(3) ubiquinol oxidase subunit 2	2	high	0.698928
cyoA	Cytochrome bo(3) ubiquinol oxidase subunit 2	2	1:1 mix	0.49293
cyoB	Cytochrome bo(3) ubiquinol oxidase subunit 1	2	low	0.397938
cyoB	Cytochrome bo(3) ubiquinol oxidase subunit 1	2	high	1.00727
cyoB	Cytochrome bo(3) ubiquinol oxidase subunit 1	2	1:1 mix	0.431145
cyoC	Cytochrome bo(3) ubiquinol oxidase subunit 3	3	low	0.575988
cyoC	Cytochrome bo(3) ubiquinol oxidase subunit 3	3	high	1.45765
cyoC	Cytochrome bo(3) ubiquinol oxidase subunit 3	3	1:1 mix	0.74695
cyoD	Cytochrome bo(3) ubiquinol oxidase subunit 4	3	low	0.155778
cyoD	Cytochrome bo(3) ubiquinol oxidase subunit 4	3	high	1.51526
cyoD	Cytochrome bo(3) ubiquinol oxidase subunit 4	3	1:1 mix	0.630084
cyoE	Protoheme IX farnesyltransferase	2	low	0.283454
cyoE	Protoheme IX farnesyltransferase	2	high	0.908374
cyoE	Protoheme IX farnesyltransferase	2	1:1 mix	0.543775
cysA	Sulfate/thiosulfate import ATP-binding protein CysA	2	high	0.213506
cysA	Sulfate/thiosulfate import ATP-binding protein CysA	2	low	0.400305
cysA	Sulfate/thiosulfate import ATP-binding protein CysA	2	1:1 mix	0.190102
cysB	HTH-type transcriptional regulator CysB	1	1:1 mix	-0.33175
cysB	HTH-type transcriptional regulator CysB	1	high	-0.393853
cysB	HTH-type transcriptional regulator CysB	1	low	-0.249257
cysC	Adenylyl-sulfate kinase	1	1:1 mix	-0.144707
cysC	Adenylyl-sulfate kinase	1	high	-0.850199
cysC	Adenylyl-sulfate kinase	1	low	0.125109
cysD	Sulfate adenylyltransferase subunit 2	1	1:1 mix	-0.0426618
cysD	Sulfate adenylyltransferase subunit 2	1	high	-0.678747
cysD	Sulfate adenylyltransferase subunit 2	1	low	-0.0228521
cysG	Siroheme synthase	2	high	0.501179
cysG	Siroheme synthase	2	low	0.552474
cysG	Siroheme synthase	2	1:1 mix	0.411455
cysJ	Sulfite reductase [NADPH] flavoprotein alpha-component	1	1:1 mix	0.101916
cysJ	Sulfite reductase [NADPH] flavoprotein alpha-component	1	high	-0.338974
cysJ	Sulfite reductase [NADPH] flavoprotein alpha-component	1	low	0.318359
cysK	Cysteine synthase A	1	1:1 mix	0.0771059
cysK	Cysteine synthase A	1	high	-0.380737
cysK	Cysteine synthase A	1	low	0.119617
cysM	Cysteine synthase B	3	high	0.134797
cysM	Cysteine synthase B	3	low	0.57181
cysM	Cysteine synthase B	3	1:1 mix	0.111507
cysN	Sulfate adenylyltransferase subunit 1	1	1:1 mix	-0.0652968
cysN	Sulfate adenylyltransferase subunit 1	1	high	-0.648594
cysN	Sulfate adenylyltransferase subunit 1	1	low	0.0428188
cysQ	3'(2'),5'-bisphosphate nucleotidase CysQ	1	1:1 mix	-0.492272
cysQ	3'(2'),5'-bisphosphate nucleotidase CysQ	1	low	-0.779482
cysQ	3'(2'),5'-bisphosphate nucleotidase CysQ	1	high	-0.507329
cysS	Cysteine--tRNA ligase	2	low	0.589817
cysS	Cysteine--tRNA ligase	2	high	0.745374
cysS	Cysteine--tRNA ligase	2	1:1 mix	0.707892
cysW	Sulfate transport system permease protein CysW	2	high	0.357282
cysW	Sulfate transport system permease protein CysW	2	low	0.386303
cysW	Sulfate transport system permease protein CysW	2	1:1 mix	0.289799
cysZ	Sulfate transporter CysZ	3	low	0.126602
cysZ	Sulfate transporter CysZ	3	high	1.63882
cysZ	Sulfate transporter CysZ	3	1:1 mix	0.853333
cytR	HTH-type transcriptional repressor CytR	2	low	0.528792
cytR	HTH-type transcriptional repressor CytR	2	high	0.667276
cytR	HTH-type transcriptional repressor CytR	2	1:1 mix	0.582415
dacA	D-alanyl-D-alanine carboxypeptidase DacA	2	low	0.311627
dacA	D-alanyl-D-alanine carboxypeptidase DacA	2	high	0.744475
dacA	D-alanyl-D-alanine carboxypeptidase DacA	2	1:1 mix	0.545676
dacC	D-alanyl-D-alanine carboxypeptidase DacC	3	low	0.0720834
dacC	D-alanyl-D-alanine carboxypeptidase DacC	3	high	1.96991
dacC	D-alanyl-D-alanine carboxypeptidase DacC	3	1:1 mix	1.12179
dadA	D-amino acid dehydrogenase	4	high	-0.724775
dadA	D-amino acid dehydrogenase	4	low	-0.0335793
dadA	D-amino acid dehydrogenase	4	1:1 mix	-0.651125
dadX	Alanine racemase, catabolic	4	high	-0.816339
dadX	Alanine racemase, catabolic	4	low	-0.129265
dadX	Alanine racemase, catabolic	4	1:1 mix	-0.651148
dapA	4-hydroxy-tetrahydrodipicolinate synthase	2	high	0.156769
dapA	4-hydroxy-tetrahydrodipicolinate synthase	2	low	0.447613
dapA	4-hydroxy-tetrahydrodipicolinate synthase	2	1:1 mix	0.300082
dapB	4-hydroxy-tetrahydrodipicolinate reductase	3	low	0.138727
dapB	4-hydroxy-tetrahydrodipicolinate reductase	3	high	0.778606
dapB	4-hydroxy-tetrahydrodipicolinate reductase	3	1:1 mix	0.534234
dapD	2,3,4,5-tetrahydropyridine-2,6-dicarboxylate N-succinyltransferase	2	low	0.279503
dapD	2,3,4,5-tetrahydropyridine-2,6-dicarboxylate N-succinyltransferase	2	high	0.425219
dapD	2,3,4,5-tetrahydropyridine-2,6-dicarboxylate N-succinyltransferase	2	1:1 mix	0.22857
dbpA	ATP-dependent RNA helicase DbpA	1	1:1 mix	-0.616177
dbpA	ATP-dependent RNA helicase DbpA	1	high	-1.15857
dbpA	ATP-dependent RNA helicase DbpA	1	low	-0.308289
dcrB	Protein DcrB	3	low	0.413668
dcrB	Protein DcrB	3	high	1.93018
dcrB	Protein DcrB	3	1:1 mix	1.20164
dctA	Aerobic C4-dicarboxylate transport protein	2	low	0.198779
dctA	Aerobic C4-dicarboxylate transport protein	2	high	0.828885
dctA	Aerobic C4-dicarboxylate transport protein	2	1:1 mix	0.366533
dctR	HTH-type transcriptional regulator DctR	4	high	-1.32908
dctR	HTH-type transcriptional regulator DctR	4	low	0.2553
dctR	HTH-type transcriptional regulator DctR	4	1:1 mix	0.148936
dcuA	Anaerobic C4-dicarboxylate transporter DcuA	3	low	-0.168984
dcuA	Anaerobic C4-dicarboxylate transporter DcuA	3	high	0.493261
dcuA	Anaerobic C4-dicarboxylate transporter DcuA	3	1:1 mix	0.0794493
dcuC	Anaerobic C4-dicarboxylate transporter DcuC	5	low	0.418124
dcuC	Anaerobic C4-dicarboxylate transporter DcuC	5	high	1.37495
dcuC	Anaerobic C4-dicarboxylate transporter DcuC	5	1:1 mix	0.0543543
dcyD	D-cysteine desulfhydrase	1	1:1 mix	-0.177887
dcyD	D-cysteine desulfhydrase	1	high	-0.47311
dcyD	D-cysteine desulfhydrase	1	low	-0.222959
ddpA	Probable D,D-dipeptide-binding periplasmic protein DdpA	4	high	-1.64487
ddpA	Probable D,D-dipeptide-binding periplasmic protein DdpA	4	low	-0.286672
ddpA	Probable D,D-dipeptide-binding periplasmic protein DdpA	4	1:1 mix	-0.917308
ddpB	Probable D,D-dipeptide transport system permease protein DdpB	4	high	-1.90691
ddpB	Probable D,D-dipeptide transport system permease protein DdpB	4	low	-0.399753
ddpB	Probable D,D-dipeptide transport system permease protein DdpB	4	1:1 mix	-0.857001
ddpC	Probable D,D-dipeptide transport system permease protein DdpC	4	high	-1.73457
ddpC	Probable D,D-dipeptide transport system permease protein DdpC	4	low	-0.415189
ddpC	Probable D,D-dipeptide transport system permease protein DdpC	4	1:1 mix	-0.817884
ddpD	Probable D,D-dipeptide transport ATP-binding protein DdpD	4	high	-1.64071
ddpD	Probable D,D-dipeptide transport ATP-binding protein DdpD	4	low	-0.402581
ddpD	Probable D,D-dipeptide transport ATP-binding protein DdpD	4	1:1 mix	-0.575729
ddpF	Probable D,D-dipeptide transport ATP-binding protein DdpF	4	high	-1.44461
ddpF	Probable D,D-dipeptide transport ATP-binding protein DdpF	4	low	-0.476884
ddpF	Probable D,D-dipeptide transport ATP-binding protein DdpF	4	1:1 mix	-0.68941
ddpX	D-alanyl-D-alanine dipeptidase	4	high	-1.60862
ddpX	D-alanyl-D-alanine dipeptidase	4	low	-0.23031
ddpX	D-alanyl-D-alanine dipeptidase	4	1:1 mix	-0.902999
dedA	Protein DedA	3	low	0.377258
dedA	Protein DedA	3	high	1.64767
dedA	Protein DedA	3	1:1 mix	0.916996
dedD	Cell division protein DedD	2	low	0.436655
dedD	Cell division protein DedD	2	high	0.861556
dedD	Cell division protein DedD	2	1:1 mix	0.467834
def	Peptide deformylase	1	1:1 mix	-0.189932
def	Peptide deformylase	1	low	-0.35507
def	Peptide deformylase	1	high	-0.209058
degP	Periplasmic serine endoprotease DegP	3	low	0.543939
degP	Periplasmic serine endoprotease DegP	3	high	3.01978
degP	Periplasmic serine endoprotease DegP	3	1:1 mix	1.91785
degQ	Periplasmic pH-dependent serine endoprotease DegQ	1	1:1 mix	-0.261154
degQ	Periplasmic pH-dependent serine endoprotease DegQ	1	high	-0.625097
degQ	Periplasmic pH-dependent serine endoprotease DegQ	1	low	-0.219706
deoB	Phosphopentomutase	3	low	0.00582282
deoB	Phosphopentomutase	3	high	0.433616
deoB	Phosphopentomutase	3	1:1 mix	0.262262
deoD	Purine nucleoside phosphorylase DeoD-type	2	low	0.0936085
deoD	Purine nucleoside phosphorylase DeoD-type	2	high	0.654825
deoD	Purine nucleoside phosphorylase DeoD-type	2	1:1 mix	0.337533
dfp	Coenzyme A biosynthesis bifunctional protein CoaBC	2	high	0.154128
dfp	Coenzyme A biosynthesis bifunctional protein CoaBC	2	low	0.69099
dfp	Coenzyme A biosynthesis bifunctional protein CoaBC	2	1:1 mix	0.400433
dgcZ	Diguanylate cyclase DgcZ	3	low	-0.401222
dgcZ	Diguanylate cyclase DgcZ	3	high	1.06986
dgcZ	Diguanylate cyclase DgcZ	3	1:1 mix	0.236492
dhaL	PEP-dependent dihydroxyacetone kinase, ADP-binding subunit DhaL	3	low	0.0348045
dhaL	PEP-dependent dihydroxyacetone kinase, ADP-binding subunit DhaL	3	high	0.499329
dhaL	PEP-dependent dihydroxyacetone kinase, ADP-binding subunit DhaL	3	1:1 mix	0.198853
dinB	DNA polymerase IV	1	1:1 mix	-0.239433
dinB	DNA polymerase IV	1	high	-0.707429
dinB	DNA polymerase IV	1	low	-0.0911483
dinG	ATP-dependent DNA helicase DinG	1	1:1 mix	-0.24504
dinG	ATP-dependent DNA helicase DinG	1	high	-0.463521
dinG	ATP-dependent DNA helicase DinG	1	low	0.258365
dinJ	Antitoxin DinJ	1	1:1 mix	-0.294027
dinJ	Antitoxin DinJ	1	low	-0.528972
dinJ	Antitoxin DinJ	1	high	-0.399888
dkgA	2,5-diketo-D-gluconic acid reductase A	3	low	-0.454961
dkgA	2,5-diketo-D-gluconic acid reductase A	3	high	-0.1487
dkgA	2,5-diketo-D-gluconic acid reductase A	3	1:1 mix	-0.101894
dksA	RNA polymerase-binding transcription factor DksA	3	low	-0.558225
dksA	RNA polymerase-binding transcription factor DksA	3	high	0.326978
dksA	RNA polymerase-binding transcription factor DksA	3	1:1 mix	0.015674
dmlA	D-malate dehydrogenase [decarboxylating]	2	low	0.489462
dmlA	D-malate dehydrogenase [decarboxylating]	2	high	0.99224
dmlA	D-malate dehydrogenase [decarboxylating]	2	1:1 mix	0.889123
dmlR	HTH-type transcriptional regulator DmlR	4	high	-1.42954
dmlR	HTH-type transcriptional regulator DmlR	4	low	0.0926928
dmlR	HTH-type transcriptional regulator DmlR	4	1:1 mix	-0.54945
dmsC	Anaerobic dimethyl sulfoxide reductase chain C	2	low	0.453663
dmsC	Anaerobic dimethyl sulfoxide reductase chain C	2	high	0.905946
dmsC	Anaerobic dimethyl sulfoxide reductase chain C	2	1:1 mix	0.576161
dnaA	Chromosomal replication initiator protein DnaA	1	1:1 mix	-0.250489
dnaA	Chromosomal replication initiator protein DnaA	1	high	-0.695439
dnaA	Chromosomal replication initiator protein DnaA	1	low	0.116069
dnaB	Replicative DNA helicase	2	high	0.0119177
dnaB	Replicative DNA helicase	2	low	0.580033
dnaB	Replicative DNA helicase	2	1:1 mix	0.510872
dnaC	DNA replication protein DnaC	1	1:1 mix	-0.379114
dnaC	DNA replication protein DnaC	1	high	-0.832718
dnaC	DNA replication protein DnaC	1	low	-0.0666383
dnaE	DNA polymerase III subunit alpha	1	1:1 mix	-0.210275
dnaE	DNA polymerase III subunit alpha	1	high	-0.541304
dnaE	DNA polymerase III subunit alpha	1	low	0.0612063
dnaJ	Chaperone protein DnaJ	3	low	0.140811
dnaJ	Chaperone protein DnaJ	3	high	1.65333
dnaJ	Chaperone protein DnaJ	3	1:1 mix	1.15626
dnaK	Chaperone protein DnaK	3	low	-0.117965
dnaK	Chaperone protein DnaK	3	high	1.8494
dnaK	Chaperone protein DnaK	3	1:1 mix	1.31651
dnaN	Beta sliding clamp	1	1:1 mix	-0.216691
dnaN	Beta sliding clamp	1	high	-0.551344
dnaN	Beta sliding clamp	1	low	0.029665
dnaT	Primosomal protein 1	1	1:1 mix	-0.183537
dnaT	Primosomal protein 1	1	high	-0.571845
dnaT	Primosomal protein 1	1	low	-0.0864487
dnaX	DNA polymerase III subunit tau	2	high	-0.232908
dnaX	DNA polymerase III subunit tau	2	low	0.435474
dnaX	DNA polymerase III subunit tau	2	1:1 mix	0.0169186
dosC	Diguanylate cyclase DosC	1	1:1 mix	-0.568104
dosC	Diguanylate cyclase DosC	1	high	-1.29788
dosC	Diguanylate cyclase DosC	1	low	-0.605576
dosP	Oxygen sensor protein DosP	1	1:1 mix	-0.700935
dosP	Oxygen sensor protein DosP	1	high	-1.3924
dosP	Oxygen sensor protein DosP	1	low	-0.712337
dppA	Dipeptide-binding protein	3	high	-0.840187
dppA	Dipeptide-binding protein	3	low	0.371521
dppA	Dipeptide-binding protein	3	1:1 mix	-0.412193
dppB	Dipeptide transport system permease protein DppB	4	high	-0.998872
dppB	Dipeptide transport system permease protein DppB	4	low	0.261708
dppB	Dipeptide transport system permease protein DppB	4	1:1 mix	-0.648226
dppC	Dipeptide transport system permease protein DppC	4	high	-1.30825
dppC	Dipeptide transport system permease protein DppC	4	low	0.0533263
dppC	Dipeptide transport system permease protein DppC	4	1:1 mix	-0.76797
dppD	Dipeptide transport ATP-binding protein DppD	4	high	-1.51936
dppD	Dipeptide transport ATP-binding protein DppD	4	low	-0.0410015
dppD	Dipeptide transport ATP-binding protein DppD	4	1:1 mix	-0.945813
dppF	Dipeptide transport ATP-binding protein DppF	4	high	-1.58149
dppF	Dipeptide transport ATP-binding protein DppF	4	low	-0.143615
dppF	Dipeptide transport ATP-binding protein DppF	4	1:1 mix	-1.00177
dsbB	Disulfide bond formation protein B	2	low	0.263451
dsbB	Disulfide bond formation protein B	2	high	1.00673
dsbB	Disulfide bond formation protein B	2	1:1 mix	0.366127
dsbG	Thiol:disulfide interchange protein DsbG	1	1:1 mix	-0.46036
dsbG	Thiol:disulfide interchange protein DsbG	1	high	-0.641577
dsbG	Thiol:disulfide interchange protein DsbG	1	low	-0.309399
dsrB	Protein DsrB	1	1:1 mix	-0.722421
dsrB	Protein DsrB	1	high	-0.971088
dsrB	Protein DsrB	1	low	-0.832344
dtd	D-aminoacyl-tRNA deacylase	1	1:1 mix	-0.312148
dtd	D-aminoacyl-tRNA deacylase	1	high	-0.498576
dtd	D-aminoacyl-tRNA deacylase	1	low	-0.0315874
dtpA	Dipeptide and tripeptide permease A	2	low	0.396546
dtpA	Dipeptide and tripeptide permease A	2	high	0.855563
dtpA	Dipeptide and tripeptide permease A	2	1:1 mix	0.71959
dtpB	Dipeptide and tripeptide permease B	1	1:1 mix	-0.444288
dtpB	Dipeptide and tripeptide permease B	1	high	-0.888689
dtpB	Dipeptide and tripeptide permease B	1	low	-0.610349
dxr	1-deoxy-D-xylulose 5-phosphate reductoisomerase	2	low	0.161271
dxr	1-deoxy-D-xylulose 5-phosphate reductoisomerase	2	high	0.582536
dxr	1-deoxy-D-xylulose 5-phosphate reductoisomerase	2	1:1 mix	0.211147
dxs	1-deoxy-D-xylulose-5-phosphate synthase	3	low	0.661387
dxs	1-deoxy-D-xylulose-5-phosphate synthase	3	high	1.70612
dxs	1-deoxy-D-xylulose-5-phosphate synthase	3	1:1 mix	1.02076
eamA	Probable amino-acid metabolite efflux pump	1	1:1 mix	-0.0291379
eamA	Probable amino-acid metabolite efflux pump	1	high	-0.443741
eamA	Probable amino-acid metabolite efflux pump	1	low	-0.0538527
ebgA	Evolved beta-galactosidase subunit alpha	4	high	-1.39711
ebgA	Evolved beta-galactosidase subunit alpha	4	low	-0.739818
ebgA	Evolved beta-galactosidase subunit alpha	4	1:1 mix	-1.21593
ebgR	HTH-type transcriptional regulator EbgR	4	high	-1.31612
ebgR	HTH-type transcriptional regulator EbgR	4	low	-0.402472
ebgR	HTH-type transcriptional regulator EbgR	4	1:1 mix	-0.92153
eco	Ecotin	2	low	0.260934
eco	Ecotin	2	high	0.795823
eco	Ecotin	2	1:1 mix	0.377448
ecpA	Common pilus major fimbrillin subunit EcpA	3	low	0.551174
ecpA	Common pilus major fimbrillin subunit EcpA	3	high	1.76931
ecpA	Common pilus major fimbrillin subunit EcpA	3	1:1 mix	1.46471
ecpR	HTH-type transcriptional regulator EcpR	5	low	2.71005
ecpR	HTH-type transcriptional regulator EcpR	5	high	5.12779
ecpR	HTH-type transcriptional regulator EcpR	5	1:1 mix	3.85007
eda	KHG/KDPG aldolase	3	low	-0.153903
eda	KHG/KDPG aldolase	3	high	0.722528
eda	KHG/KDPG aldolase	3	1:1 mix	0.472496
elaB	Protein ElaB	1	1:1 mix	-0.560288
elaB	Protein ElaB	1	high	-0.823701
elaB	Protein ElaB	1	low	-0.537723
elfG	Uncharacterized fimbrial-like protein ElfG	5	high	-0.79579
elfG	Uncharacterized fimbrial-like protein ElfG	5	low	-0.122787
elfG	Uncharacterized fimbrial-like protein ElfG	5	1:1 mix	-1.43178
emrK	Probable multidrug resistance protein EmrK	4	high	-1.85428
emrK	Probable multidrug resistance protein EmrK	4	low	-0.802222
emrK	Probable multidrug resistance protein EmrK	4	1:1 mix	-1.45634
eno	Enolase	1	1:1 mix	-0.45863
eno	Enolase	1	high	-0.969273
eno	Enolase	1	low	-0.498576
entA	2,3-dihydro-2,3-dihydroxybenzoate dehydrogenase	3	low	0.497283
entA	2,3-dihydro-2,3-dihydroxybenzoate dehydrogenase	3	high	1.39545
entA	2,3-dihydro-2,3-dihydroxybenzoate dehydrogenase	3	1:1 mix	0.587949
entB	Enterobactin synthase component B	2	low	0.534269
entB	Enterobactin synthase component B	2	high	0.948728
entB	Enterobactin synthase component B	2	1:1 mix	0.592635
entC	Isochorismate synthase EntC	2	low	0.324988
entC	Isochorismate synthase EntC	2	high	0.506401
entC	Isochorismate synthase EntC	2	1:1 mix	0.376434
entE	Enterobactin synthase component E	2	low	0.250321
entE	Enterobactin synthase component E	2	high	0.577782
entE	Enterobactin synthase component E	2	1:1 mix	0.493003
entF	Enterobactin synthase component F	3	low	1.15357
entF	Enterobactin synthase component F	3	high	1.76745
entF	Enterobactin synthase component F	3	1:1 mix	1.05389
entS	Enterobactin exporter EntS	2	low	0.477723
entS	Enterobactin exporter EntS	2	high	1.05103
entS	Enterobactin exporter EntS	2	1:1 mix	0.72157
epmC	Elongation factor P hydroxylase	5	low	0.441028
epmC	Elongation factor P hydroxylase	5	high	0.960751
epmC	Elongation factor P hydroxylase	5	1:1 mix	0.053134
eptA	Phosphoethanolamine transferase EptA	2	low	-0.0776605
eptA	Phosphoethanolamine transferase EptA	2	high	0.814945
eptA	Phosphoethanolamine transferase EptA	2	1:1 mix	-0.0717878
era	GTPase Era	1	1:1 mix	-0.567143
era	GTPase Era	1	high	-0.932117
era	GTPase Era	1	low	-0.574401
erpA	Iron-sulfur cluster insertion protein ErpA	3	low	0.288158
erpA	Iron-sulfur cluster insertion protein ErpA	3	high	2.34221
erpA	Iron-sulfur cluster insertion protein ErpA	3	1:1 mix	1.48692
etk	Tyrosine-protein kinase etk	3	low	0.263092
etk	Tyrosine-protein kinase etk	3	high	0.758561
etk	Tyrosine-protein kinase etk	3	1:1 mix	0.02443
eutB	Ethanolamine ammonia-lyase large subunit	3	low	0.367969
eutB	Ethanolamine ammonia-lyase large subunit	3	high	1.29346
eutB	Ethanolamine ammonia-lyase large subunit	3	1:1 mix	0.593915
eutC	Ethanolamine ammonia-lyase small subunit	2	low	0.11153
eutC	Ethanolamine ammonia-lyase small subunit	2	high	1.05438
eutC	Ethanolamine ammonia-lyase small subunit	2	1:1 mix	0.471744
eutH	Probable ethanolamine permease EutH	4	high	-1.30431
eutH	Probable ethanolamine permease EutH	4	low	-0.141737
eutH	Probable ethanolamine permease EutH	4	1:1 mix	-0.342918
eutK	Bacterial microcompartment shell protein EutK	3	low	0.419647
eutK	Bacterial microcompartment shell protein EutK	3	high	1.32818
eutK	Bacterial microcompartment shell protein EutK	3	1:1 mix	0.392317
eutL	Bacterial microcompartment shell protein EutL	3	low	0.594904
eutL	Bacterial microcompartment shell protein EutL	3	high	1.32666
eutL	Bacterial microcompartment shell protein EutL	3	1:1 mix	0.863433
evgA	DNA-binding transcriptional activator EvgA	4	high	-1.79054
evgA	DNA-binding transcriptional activator EvgA	4	low	-0.466063
evgA	DNA-binding transcriptional activator EvgA	4	1:1 mix	-0.774514
evgS	Sensor protein EvgS	4	high	-1.80506
evgS	Sensor protein EvgS	4	low	-0.537768
evgS	Sensor protein EvgS	4	1:1 mix	-1.03893
exbD	Biopolymer transport protein ExbD	2	high	0.294483
exbD	Biopolymer transport protein ExbD	2	low	0.513605
exbD	Biopolymer transport protein ExbD	2	1:1 mix	0.379728
exuR	Exu regulon transcriptional regulator	3	low	-0.110284
exuR	Exu regulon transcriptional regulator	3	high	1.05939
exuR	Exu regulon transcriptional regulator	3	1:1 mix	0.546354
exuT	Hexuronate transporter	3	low	-0.369432
exuT	Hexuronate transporter	3	high	0.368398
exuT	Hexuronate transporter	3	1:1 mix	-0.0210712
fabA	3-hydroxydecanoyl-[acyl-carrier-protein] dehydratase	1	1:1 mix	-0.354165
fabA	3-hydroxydecanoyl-[acyl-carrier-protein] dehydratase	1	low	-0.533847
fabA	3-hydroxydecanoyl-[acyl-carrier-protein] dehydratase	1	high	-0.384103
fabB	3-oxoacyl-[acyl-carrier-protein] synthase 1	2	low	0.601954
fabB	3-oxoacyl-[acyl-carrier-protein] synthase 1	2	high	0.624598
fabB	3-oxoacyl-[acyl-carrier-protein] synthase 1	2	1:1 mix	0.467479
fabF	3-oxoacyl-[acyl-carrier-protein] synthase 2	1	1:1 mix	-0.392721
fabF	3-oxoacyl-[acyl-carrier-protein] synthase 2	1	high	-0.415473
fabF	3-oxoacyl-[acyl-carrier-protein] synthase 2	1	low	-0.348782
fabR	HTH-type transcriptional repressor FabR	3	low	0.963783
fabR	HTH-type transcriptional repressor FabR	3	high	2.02267
fabR	HTH-type transcriptional repressor FabR	3	1:1 mix	1.34254
fabZ	3-hydroxyacyl-[acyl-carrier-protein] dehydratase FabZ	2	high	-0.0623015
fabZ	3-hydroxyacyl-[acyl-carrier-protein] dehydratase FabZ	2	low	0.420036
fabZ	3-hydroxyacyl-[acyl-carrier-protein] dehydratase FabZ	2	1:1 mix	0.0678874
fadA	3-ketoacyl-CoA thiolase FadA	3	high	0.822242
fadA	3-ketoacyl-CoA thiolase FadA	3	low	1.33848
fadA	3-ketoacyl-CoA thiolase FadA	3	1:1 mix	0.71319
fadB	Fatty acid oxidation complex subunit alpha	3	high	0.61557
fadB	Fatty acid oxidation complex subunit alpha	3	low	1.25737
fadB	Fatty acid oxidation complex subunit alpha	3	1:1 mix	0.525441
fadD	Long-chain-fatty-acid--CoA ligase	3	high	-0.702652
fadD	Long-chain-fatty-acid--CoA ligase	3	low	0.213698
fadD	Long-chain-fatty-acid--CoA ligase	3	1:1 mix	-0.578809
fadH	2,4-dienoyl-CoA reductase [(2E)-enoyl-CoA-producing]	3	high	-0.104938
fadH	2,4-dienoyl-CoA reductase [(2E)-enoyl-CoA-producing]	3	low	1.0008
fadH	2,4-dienoyl-CoA reductase [(2E)-enoyl-CoA-producing]	3	1:1 mix	0.119134
fadI	3-ketoacyl-CoA thiolase FadI	3	high	-0.396685
fadI	3-ketoacyl-CoA thiolase FadI	3	low	0.547159
fadI	3-ketoacyl-CoA thiolase FadI	3	1:1 mix	-0.193039
fadL	Long-chain fatty acid transport protein	3	high	-0.540164
fadL	Long-chain fatty acid transport protein	3	low	0.269052
fadL	Long-chain fatty acid transport protein	3	1:1 mix	-0.383368
fadM	Long-chain acyl-CoA thioesterase FadM	1	1:1 mix	-0.304626
fadM	Long-chain acyl-CoA thioesterase FadM	1	high	-0.650635
fadM	Long-chain acyl-CoA thioesterase FadM	1	low	-0.278986
fbaA	Fructose-bisphosphate aldolase class 2	1	1:1 mix	-0.34756
fbaA	Fructose-bisphosphate aldolase class 2	1	high	-0.572619
fbaA	Fructose-bisphosphate aldolase class 2	1	low	-0.275017
fbaB	Fructose-bisphosphate aldolase class 1	2	low	-0.108897
fbaB	Fructose-bisphosphate aldolase class 1	2	high	0.847619
fbaB	Fructose-bisphosphate aldolase class 1	2	1:1 mix	0.163711
fbp	Fructose-1,6-bisphosphatase class 1	3	low	0.17512
fbp	Fructose-1,6-bisphosphatase class 1	3	high	1.70169
fbp	Fructose-1,6-bisphosphatase class 1	3	1:1 mix	0.9885
fdhF	Formate dehydrogenase H	3	low	0.594383
fdhF	Formate dehydrogenase H	3	high	1.85709
fdhF	Formate dehydrogenase H	3	1:1 mix	0.812742
fdoH	Formate dehydrogenase-O iron-sulfur subunit	1	1:1 mix	-0.270376
fdoH	Formate dehydrogenase-O iron-sulfur subunit	1	high	-0.489591
fdoH	Formate dehydrogenase-O iron-sulfur subunit	1	low	-0.222042
fdoI	Formate dehydrogenase, cytochrome b556(fdo) subunit	1	1:1 mix	-0.243069
fdoI	Formate dehydrogenase, cytochrome b556(fdo) subunit	1	high	-0.547227
fdoI	Formate dehydrogenase, cytochrome b556(fdo) subunit	1	low	-0.224831
fdx	2Fe-2S ferredoxin	3	low	0.789764
fdx	2Fe-2S ferredoxin	3	high	1.10042
fdx	2Fe-2S ferredoxin	3	1:1 mix	0.46124
feaR	Transcriptional activator FeaR	4	high	-1.01437
feaR	Transcriptional activator FeaR	4	low	0.436296
feaR	Transcriptional activator FeaR	4	1:1 mix	-0.337338
fecA	Fe(3+) dicitrate transport protein FecA	2	high	-0.220651
fecA	Fe(3+) dicitrate transport protein FecA	2	low	0.503909
fecA	Fe(3+) dicitrate transport protein FecA	2	1:1 mix	0.188748
fecI	Probable RNA polymerase sigma factor FecI	3	high	-0.208824
fecI	Probable RNA polymerase sigma factor FecI	3	low	0.485822
fecI	Probable RNA polymerase sigma factor FecI	3	1:1 mix	-0.155574
fecR	Protein FecR	3	high	-0.393998
fecR	Protein FecR	3	low	0.445873
fecR	Protein FecR	3	1:1 mix	-0.316084
feoB	Fe(2+) transporter FeoB	3	low	0.0969043
feoB	Fe(2+) transporter FeoB	3	high	1.86123
feoB	Fe(2+) transporter FeoB	3	1:1 mix	0.936847
feoC	Probable [Fe-S]-dependent transcriptional repressor FeoC	5	low	1.51335
feoC	Probable [Fe-S]-dependent transcriptional repressor FeoC	5	high	3.01152
feoC	Probable [Fe-S]-dependent transcriptional repressor FeoC	5	1:1 mix	1.47324
fepA	Ferrienterobactin receptor	2	low	0.347592
fepA	Ferrienterobactin receptor	2	high	0.837018
fepA	Ferrienterobactin receptor	2	1:1 mix	0.545431
fepB	Ferrienterobactin-binding periplasmic protein	2	high	0.453126
fepB	Ferrienterobactin-binding periplasmic protein	2	low	0.71242
fepB	Ferrienterobactin-binding periplasmic protein	2	1:1 mix	0.698787
fes	Iron(III) enterobactin esterase	3	low	1.27233
fes	Iron(III) enterobactin esterase	3	high	1.32145
fes	Iron(III) enterobactin esterase	3	1:1 mix	1.10865
fhlA	Formate hydrogenlyase transcriptional activator FhlA	1	1:1 mix	-0.185906
fhlA	Formate hydrogenlyase transcriptional activator FhlA	1	low	-0.509869
fhlA	Formate hydrogenlyase transcriptional activator FhlA	1	high	-0.311914
fhuF	Ferric iron reductase protein FhuF	1	1:1 mix	0.104312
fhuF	Ferric iron reductase protein FhuF	1	high	-0.324692
fhuF	Ferric iron reductase protein FhuF	1	low	0.292737
fic	Probable protein adenylyltransferase Fic	1	1:1 mix	-0.620896
fic	Probable protein adenylyltransferase Fic	1	high	-1.0798
fic	Probable protein adenylyltransferase Fic	1	low	-0.567539
fimA	Type-1 fimbrial protein, A chain	3	low	-0.531589
fimA	Type-1 fimbrial protein, A chain	3	high	0.00895806
fimA	Type-1 fimbrial protein, A chain	3	1:1 mix	-0.370914
fis	DNA-binding protein Fis	2	low	0.175117
fis	DNA-binding protein Fis	2	high	0.471223
fis	DNA-binding protein Fis	2	1:1 mix	0.284943
fkpB	FKBP-type 16 kDa peptidyl-prolyl cis-trans isomerase	2	low	0.298774
fkpB	FKBP-type 16 kDa peptidyl-prolyl cis-trans isomerase	2	high	1.18323
fkpB	FKBP-type 16 kDa peptidyl-prolyl cis-trans isomerase	2	1:1 mix	0.646865
flc	Flavodoxin 2	1	1:1 mix	-0.604284
flc	Flavodoxin 2	1	high	-0.533181
flc	Flavodoxin 2	1	low	-0.5209
fldB	Negative regulator of flagellin synthesis	2	low	0.243014
fldB	Negative regulator of flagellin synthesis	2	high	0.803473
fldB	Negative regulator of flagellin synthesis	2	1:1 mix	0.363602
flgM	Flagellar transcriptional regulator FlhC	4	high	-2.41624
flgM	Flagellar transcriptional regulator FlhC	4	low	-0.473686
flgM	Flagellar transcriptional regulator FlhC	4	1:1 mix	-0.072871
flhC	Flagellar transcriptional regulator FlhD	4	high	-1.95511
flhC	Flagellar transcriptional regulator FlhD	4	low	-1.12204
flhC	Flagellar transcriptional regulator FlhD	4	1:1 mix	-1.12713
flhD	Flagellin	4	high	-1.58638
flhD	Flagellin	4	low	-0.744357
flhD	Flagellin	4	1:1 mix	-1.29466
fliC	Flagellar hook-associated protein 2	3	low	-0.191324
fliC	Flagellar hook-associated protein 2	3	high	0.60275
fliC	Flagellar hook-associated protein 2	3	1:1 mix	0.068885
fliD	Antigen 43	4	high	-0.902787
fliD	Antigen 43	4	low	-0.0419841
fliD	Antigen 43	4	1:1 mix	-0.598579
flu	Methionyl-tRNA formyltransferase	2	low	-0.00711142
flu	Methionyl-tRNA formyltransferase	2	high	1.14124
flu	Methionyl-tRNA formyltransferase	2	1:1 mix	0.315504
fmt	Probable formate transporter 1	1	1:1 mix	-0.426739
fmt	Probable formate transporter 1	1	high	-0.888613
fmt	Probable formate transporter 1	1	low	-0.361933
focA	GTP cyclohydrolase 1	1	1:1 mix	-0.195725
focA	GTP cyclohydrolase 1	1	high	-0.591724
focA	GTP cyclohydrolase 1	1	low	-0.164577
folE	Dihydromonapterin reductase	1	1:1 mix	-0.207658
folE	Dihydromonapterin reductase	1	high	-0.33939
folE	Dihydromonapterin reductase	1	low	0.121407
folM	Multiphosphoryl transfer protein	1	1:1 mix	-0.403304
folM	Flavodoxin/ferredoxin--NADP reductase	1	high	-0.602329
folM	Multiphosphoryl transfer protein	1	low	-0.300608
fpr	Flavodoxin/ferredoxin--NADP reductase	2	low	0.531149
fpr	Multiphosphoryl transfer protein	2	high	0.752948
fpr	Flavodoxin/ferredoxin--NADP reductase	2	1:1 mix	0.740321
frmA	S-(hydroxymethyl)glutathione dehydrogenase	1	1:1 mix	-0.374503
frmA	S-(hydroxymethyl)glutathione dehydrogenase	1	low	-0.47879
frmA	S-(hydroxymethyl)glutathione dehydrogenase	1	high	-0.293429
frmB	S-formylglutathione hydrolase FrmB	4	high	-1.67455
frmB	S-formylglutathione hydrolase FrmB	4	low	-0.828067
frmB	S-formylglutathione hydrolase FrmB	4	1:1 mix	-0.88665
fryA	Multiphosphoryl transfer protein 1	4	low	-0.835209
fryA	Multiphosphoryl transfer protein 1	4	high	-0.14072
fryA	Multiphosphoryl transfer protein 1	4	1:1 mix	-0.995219
ftnB	Bacterial non-heme ferritin-like protein	3	low	0.29603
ftnB	Bacterial non-heme ferritin-like protein	3	high	2.28646
ftnB	Bacterial non-heme ferritin-like protein	3	1:1 mix	1.4059
ftsA	Cell division protein FtsA	2	low	0.300366
ftsA	Cell division protein FtsA	2	high	0.927641
ftsA	Cell division protein FtsA	2	1:1 mix	0.774153
ftsE	Cell division ATP-binding protein FtsE	2	low	0.303589
ftsE	Cell division ATP-binding protein FtsE	2	high	0.763104
ftsE	Cell division ATP-binding protein FtsE	2	1:1 mix	0.329535
ftsH	ATP-dependent zinc metalloprotease FtsH	3	low	-0.334702
ftsH	ATP-dependent zinc metalloprotease FtsH	3	high	0.622097
ftsH	ATP-dependent zinc metalloprotease FtsH	3	1:1 mix	0.309849
ftsP	Cell division protein FtsP	1	1:1 mix	-0.466134
ftsP	Cell division protein FtsP	1	high	-1.21953
ftsP	Cell division protein FtsP	1	low	-0.155145
ftsQ	Cell division protein FtsQ	2	low	0.207892
ftsQ	Cell division protein FtsQ	2	high	0.531706
ftsQ	Cell division protein FtsQ	2	1:1 mix	0.591288
ftsX	Cell division protein FtsX	2	low	0.163131
ftsX	Cell division protein FtsX	2	high	1.0541
ftsX	Cell division protein FtsX	2	1:1 mix	0.522244
ftsY	Signal recognition particle receptor FtsY	3	low	0.50163
ftsY	Signal recognition particle receptor FtsY	3	high	1.44858
ftsY	Signal recognition particle receptor FtsY	3	1:1 mix	0.896828
ftsZ	Cell division protein FtsZ	2	low	0.344007
ftsZ	Cell division protein FtsZ	2	high	0.928578
ftsZ	Cell division protein FtsZ	2	1:1 mix	0.810526
fucO	Lactaldehyde reductase	3	low	0.464113
fucO	Lactaldehyde reductase	3	high	1.59156
fucO	Lactaldehyde reductase	3	1:1 mix	0.695805
fucU	L-fucose mutarotase	3	low	-0.451603
fucU	L-fucose mutarotase	3	high	0.7932
fucU	L-fucose mutarotase	3	1:1 mix	0.242715
fur	Ferric uptake regulation protein	2	low	0.118068
fur	Ferric uptake regulation protein	2	high	0.540745
fur	Ferric uptake regulation protein	2	1:1 mix	0.235125
gabD	Succinate-semialdehyde dehydrogenase [NADP(+)] GabD	1	1:1 mix	-0.216903
gabD	Succinate-semialdehyde dehydrogenase [NADP(+)] GabD	1	high	-0.39252
gabD	Succinate-semialdehyde dehydrogenase [NADP(+)] GabD	1	low	-0.0648478
gabP	GABA permease	1	1:1 mix	-0.390472
gabP	GABA permease	1	high	-1.09559
gabP	GABA permease	1	low	-0.120611
gabT	4-aminobutyrate aminotransferase GabT	1	1:1 mix	-0.248938
gabT	4-aminobutyrate aminotransferase GabT	1	high	-0.554342
gabT	4-aminobutyrate aminotransferase GabT	1	low	-0.024506
gadA	Glutamate decarboxylase alpha	2	low	0.642687
gadA	Glutamate decarboxylase alpha	2	high	1.09299
gadA	Glutamate decarboxylase alpha	2	1:1 mix	0.795826
gadB	Glutamate decarboxylase beta	3	low	0.814142
gadB	Glutamate decarboxylase beta	3	high	0.959304
gadB	Glutamate decarboxylase beta	3	1:1 mix	0.634673
gadC	Glutamate/gamma-aminobutyrate antiporter	3	low	0.582163
gadC	Glutamate/gamma-aminobutyrate antiporter	3	high	1.39893
gadC	Glutamate/gamma-aminobutyrate antiporter	3	1:1 mix	0.698097
gadE	Transcriptional regulator GadE	1	1:1 mix	-0.588556
gadE	Transcriptional regulator GadE	1	high	-1.35703
gadE	Transcriptional regulator GadE	1	low	-0.341225
gadX	HTH-type transcriptional regulator GadX	1	1:1 mix	-0.110834
gadX	HTH-type transcriptional regulator GadX	1	high	-0.608005
gadX	HTH-type transcriptional regulator GadX	1	low	0.250214
galE	UDP-glucose 4-epimerase	2	low	0.208982
galE	UDP-glucose 4-epimerase	2	high	0.904148
galE	UDP-glucose 4-epimerase	2	1:1 mix	0.394548
galP	Galactose-proton symporter	3	low	0.576414
galP	Galactose-proton symporter	3	high	2.86729
galP	Galactose-proton symporter	3	1:1 mix	1.82341
galU	UTP--glucose-1-phosphate uridylyltransferase	3	low	-0.612448
galU	UTP--glucose-1-phosphate uridylyltransferase	3	high	0.202384
galU	UTP--glucose-1-phosphate uridylyltransferase	3	1:1 mix	-0.402138
gapC	Glyceraldehyde-3-phosphate dehydrogenase C	4	high	-1.67353
gapC	Glyceraldehyde-3-phosphate dehydrogenase C	4	low	-0.682787
gapC	Glyceraldehyde-3-phosphate dehydrogenase C	4	1:1 mix	-0.855632
gatA	PTS system galactitol-specific EIIA component	3	high	-0.681062
gatA	PTS system galactitol-specific EIIA component	3	low	0.496639
gatA	PTS system galactitol-specific EIIA component	3	1:1 mix	-0.304699
gatB	PTS system galactitol-specific EIIB component	3	high	-0.678785
gatB	PTS system galactitol-specific EIIB component	3	low	0.296551
gatB	PTS system galactitol-specific EIIB component	3	1:1 mix	-0.543628
gatC	PTS system galactitol-specific EIIC component	3	high	-0.745475
gatC	PTS system galactitol-specific EIIC component	3	low	0.143846
gatC	PTS system galactitol-specific EIIC component	3	1:1 mix	-0.456224
gatD	Galactitol 1-phosphate 5-dehydrogenase	4	high	-1.13272
gatD	Galactitol 1-phosphate 5-dehydrogenase	4	low	0.141048
gatD	Galactitol 1-phosphate 5-dehydrogenase	4	1:1 mix	-0.627734
gatR	Putative galactitol utilization operon repressor	4	high	-1.25802
gatR	Putative galactitol utilization operon repressor	4	low	0.148924
gatR	Putative galactitol utilization operon repressor	4	1:1 mix	-0.744349
gatZ	D-tagatose-1,6-bisphosphate aldolase subunit GatZ	3	high	-0.504952
gatZ	D-tagatose-1,6-bisphosphate aldolase subunit GatZ	3	low	0.38561
gatZ	D-tagatose-1,6-bisphosphate aldolase subunit GatZ	3	1:1 mix	-0.18466
gcd	Quinoprotein glucose dehydrogenase	1	1:1 mix	-0.402661
gcd	Quinoprotein glucose dehydrogenase	1	high	-0.950764
gcd	Quinoprotein glucose dehydrogenase	1	low	-0.435203
gcl	Glyoxylate carboligase	5	low	-1.97546
gcl	Glyoxylate carboligase	5	high	-1.45483
gcl	Glyoxylate carboligase	5	1:1 mix	-1.70552
gcvA	Glycine cleavage system transcriptional activator	2	low	0.284213
gcvA	Glycine cleavage system transcriptional activator	2	high	0.95925
gcvA	Glycine cleavage system transcriptional activator	2	1:1 mix	0.478226
gcvR	Glycine cleavage system transcriptional repressor	1	1:1 mix	0.0425089
gcvR	Glycine cleavage system transcriptional repressor	1	high	-0.423578
gcvR	Glycine cleavage system transcriptional repressor	1	low	0.196429
gcvT	Aminomethyltransferase	3	high	-0.360247
gcvT	Aminomethyltransferase	3	low	-0.236083
gcvT	Aminomethyltransferase	3	1:1 mix	-0.525056
gfcA	Threonine-rich inner membrane protein GfcA	4	high	-3.89444
gfcA	Threonine-rich inner membrane protein GfcA	4	low	-1.84455
gfcA	Threonine-rich inner membrane protein GfcA	4	1:1 mix	-1.69583
gfcB	Uncharacterized lipoprotein GfcB	4	high	-3.38104
gfcB	Uncharacterized lipoprotein GfcB	4	low	-0.419242
gfcB	Uncharacterized lipoprotein GfcB	4	1:1 mix	-1.17848
ggt	Glutathione hydrolase proenzyme	4	high	-1.13125
ggt	Glutathione hydrolase proenzyme	4	low	-0.682015
ggt	Glutathione hydrolase proenzyme	4	1:1 mix	-0.916789
ghrB	Glyoxylate/hydroxypyruvate reductase B	2	high	0.291336
ghrB	Glyoxylate/hydroxypyruvate reductase B	2	low	0.647578
ghrB	Glyoxylate/hydroxypyruvate reductase B	2	1:1 mix	0.510588
glcB	Malate synthase G	1	1:1 mix	-0.634125
glcB	Malate synthase G	1	high	-0.90526
glcB	Malate synthase G	1	low	-0.739822
glcC	Glc operon transcriptional activator	3	low	1.17509
glcC	Glc operon transcriptional activator	3	high	2.38091
glcC	Glc operon transcriptional activator	3	1:1 mix	1.5026
glcD	Glycolate oxidase subunit GlcD	1	1:1 mix	-0.773182
glcD	Glycolate oxidase subunit GlcD	1	high	-0.981561
glcD	Glycolate oxidase subunit GlcD	1	low	-0.590874
glcE	Glycolate oxidase subunit GlcE	1	1:1 mix	-0.676558
glcE	Glycolate oxidase subunit GlcE	1	high	-0.903754
glcE	Glycolate oxidase subunit GlcE	1	low	-0.583337
glcF	Glycolate oxidase iron-sulfur subunit	1	1:1 mix	-0.726078
glcF	Glycolate oxidase iron-sulfur subunit	1	high	-0.93355
glcF	Glycolate oxidase iron-sulfur subunit	1	low	-0.656598
glcG	Protein GlcG	1	1:1 mix	-0.653741
glcG	Protein GlcG	1	high	-0.964788
glcG	Protein GlcG	1	low	-0.650669
gldA	Glycerol dehydrogenase	3	low	0.203202
gldA	Glycerol dehydrogenase	3	high	1.21859
gldA	Glycerol dehydrogenase	3	1:1 mix	0.928032
glf	UDP-galactopyranose mutase	1	1:1 mix	0.0539819
glf	UDP-galactopyranose mutase	1	high	-0.335717
glf	UDP-galactopyranose mutase	1	low	0.151921
glgB	1,4-alpha-glucan branching enzyme GlgB	1	1:1 mix	-0.227795
glgB	1,4-alpha-glucan branching enzyme GlgB	1	high	-0.418836
glgB	1,4-alpha-glucan branching enzyme GlgB	1	low	-0.203037
glgS	Surface composition regulator	3	low	-0.540676
glgS	Surface composition regulator	3	high	0.563235
glgS	Surface composition regulator	3	1:1 mix	0.0536305
glk	Glucokinase	3	low	0.594306
glk	Glucokinase	3	high	2.08534
glk	Glucokinase	3	1:1 mix	1.3313
glmM	Phosphoglucosamine mutase	2	low	0.280237
glmM	Phosphoglucosamine mutase	2	high	0.376718
glmM	Phosphoglucosamine mutase	2	1:1 mix	0.397666
glmS	Glutamine--fructose-6-phosphate aminotransferase [isomerizing]	3	low	-0.0583972
glmS	Glutamine--fructose-6-phosphate aminotransferase [isomerizing]	3	high	0.734339
glmS	Glutamine--fructose-6-phosphate aminotransferase [isomerizing]	3	1:1 mix	0.389953
glnG	DNA-binding transcriptional regulator NtrC	3	high	-0.276526
glnG	DNA-binding transcriptional regulator NtrC	3	low	-0.162511
glnG	DNA-binding transcriptional regulator NtrC	3	1:1 mix	-0.515543
glnQ	Glutamine transport ATP-binding protein GlnQ	4	high	-0.648859
glnQ	Glutamine transport ATP-binding protein GlnQ	4	low	-0.0723775
glnQ	Glutamine transport ATP-binding protein GlnQ	4	1:1 mix	-0.677081
gloB	Hydroxyacylglutathione hydrolase GloB	1	1:1 mix	-0.278306
gloB	Hydroxyacylglutathione hydrolase GloB	1	high	-0.894411
gloB	Hydroxyacylglutathione hydrolase GloB	1	low	-0.169383
glpA	Anaerobic glycerol-3-phosphate dehydrogenase subunit A	3	low	0.760258
glpA	Anaerobic glycerol-3-phosphate dehydrogenase subunit A	3	high	2.56556
glpA	Anaerobic glycerol-3-phosphate dehydrogenase subunit A	3	1:1 mix	1.38154
glpD	Aerobic glycerol-3-phosphate dehydrogenase	3	low	-0.844288
glpD	Aerobic glycerol-3-phosphate dehydrogenase	3	high	1.27383
glpD	Aerobic glycerol-3-phosphate dehydrogenase	3	1:1 mix	0.312381
glpF	Glycerol uptake facilitator protein	3	low	0.163245
glpF	Glycerol uptake facilitator protein	3	high	1.21617
glpF	Glycerol uptake facilitator protein	3	1:1 mix	0.600259
glpK	Glycerol kinase	3	low	0.00972898
glpK	Glycerol kinase	3	high	0.993946
glpK	Glycerol kinase	3	1:1 mix	0.526133
glsA		2	low	0.434288
glsA		2	high	0.659456
glsA		2	1:1 mix	0.468295
gltA	Citrate synthase	2	low	0.397427
gltA	Citrate synthase	2	high	0.713555
gltA	Citrate synthase	2	1:1 mix	0.492378
gltI	Glutamate/aspartate import solute-binding protein	1	1:1 mix	-0.322349
gltI	Glutamate/aspartate import solute-binding protein	1	high	-0.530448
gltI	Glutamate/aspartate import solute-binding protein	1	low	0.0363893
gltJ	Glutamate/aspartate import permease protein GltJ	1	1:1 mix	-0.517014
gltJ	Glutamate/aspartate import permease protein GltJ	1	high	-0.580359
gltJ	Glutamate/aspartate import permease protein GltJ	1	low	-0.340385
gltK	Glutamate/aspartate import permease protein GltK	1	1:1 mix	-0.511967
gltK	Glutamate/aspartate import permease protein GltK	1	high	-0.679172
gltK	Glutamate/aspartate import permease protein GltK	1	low	-0.0940145
gltS	Sodium/glutamate symporter	1	1:1 mix	-0.383715
gltS	Sodium/glutamate symporter	1	high	-0.650376
gltS	Sodium/glutamate symporter	1	low	-0.60929
glxR	2-hydroxy-3-oxopropionate reductase	5	low	-3.93993
glxR	2-hydroxy-3-oxopropionate reductase	5	high	-1.72159
glxR	2-hydroxy-3-oxopropionate reductase	5	1:1 mix	-3.0444
glyS	Glycine--tRNA ligase beta subunit	2	high	0.460158
glyS	Glycine--tRNA ligase beta subunit	2	low	0.465064
glyS	Glycine--tRNA ligase beta subunit	2	1:1 mix	0.391184
gmhA	Phosphoheptose isomerase	2	high	0.0441391
gmhA	Phosphoheptose isomerase	2	low	0.409424
gmhA	Phosphoheptose isomerase	2	1:1 mix	0.268197
gmk	Guanylate kinase	1	1:1 mix	-0.346231
gmk	Guanylate kinase	1	high	-0.672382
gmk	Guanylate kinase	1	low	-0.27135
gntP	High-affinity gluconate transporter	3	low	0.773294
gntP	High-affinity gluconate transporter	3	high	1.97778
gntP	High-affinity gluconate transporter	3	1:1 mix	1.39594
gpmA	2,3-bisphosphoglycerate-dependent phosphoglycerate mutase	2	low	0.102959
gpmA	2,3-bisphosphoglycerate-dependent phosphoglycerate mutase	2	high	0.803612
gpmA	2,3-bisphosphoglycerate-dependent phosphoglycerate mutase	2	1:1 mix	0.437733
gpmM	2,3-bisphosphoglycerate-independent phosphoglycerate mutase	1	1:1 mix	-0.190967
gpmM	2,3-bisphosphoglycerate-independent phosphoglycerate mutase	1	high	-0.312266
gpmM	2,3-bisphosphoglycerate-independent phosphoglycerate mutase	1	low	-0.146446
gpp	Xanthine-guanine phosphoribosyltransferase	1	1:1 mix	-0.0614052
gpp	Xanthine-guanine phosphoribosyltransferase	1	high	-0.351688
gpp	Xanthine-guanine phosphoribosyltransferase	1	low	0.161471
grcA	Autonomous glycyl radical cofactor	5	low	0.316653
grcA	Autonomous glycyl radical cofactor	5	high	5.19216
grcA	Autonomous glycyl radical cofactor	5	1:1 mix	3.68053
groL	60 kDa chaperonin	3	low	0.328963
groL	60 kDa chaperonin	3	high	1.85856
groL	60 kDa chaperonin	3	1:1 mix	1.22501
groS	10 kDa chaperonin	3	low	0.109718
groS	10 kDa chaperonin	3	high	0.74031
groS	10 kDa chaperonin	3	1:1 mix	0.535324
grpE	Protein GrpE	3	low	-0.0531775
grpE	Protein GrpE	3	high	0.961236
grpE	Protein GrpE	3	1:1 mix	0.62179
grxB	Glutaredoxin 2	1	1:1 mix	-0.271332
grxB	Glutaredoxin 2	1	high	-0.984988
grxB	Glutaredoxin 2	1	low	-0.169846
grxC	Glutaredoxin 3	1	1:1 mix	-0.185111
grxC	Glutaredoxin 3	1	high	-0.59625
grxC	Glutaredoxin 3	1	low	-0.0722594
gshA	Glutamate--cysteine ligase	1	1:1 mix	-0.270065
gshA	Glutamate--cysteine ligase	1	high	-0.526447
gshA	Glutamate--cysteine ligase	1	low	-0.291371
gspB	Putative general secretion pathway protein B	5	high	1.19361
gspB	Putative general secretion pathway protein B	5	low	1.50292
gspB	Putative general secretion pathway protein B	5	1:1 mix	1.44224
gspL	Putative type II secretion system protein L	4	high	-1.50146
gspL	Putative type II secretion system protein L	4	low	-0.502477
gspL	Putative type II secretion system protein L	4	1:1 mix	-0.814063
gspM	Putative type II secretion system protein M	4	high	-2.12181
gspM	Putative type II secretion system protein M	4	low	-0.794213
gspM	Putative type II secretion system protein M	4	1:1 mix	-1.4166
gstA	Glutathione S-transferase GstA	1	1:1 mix	-0.1395
gstA	Glutathione S-transferase GstA	1	high	-0.317017
gstA	Glutathione S-transferase GstA	1	low	-0.122286
gstB	Glutathione S-transferase GstB	2	high	0.20935
gstB	Glutathione S-transferase GstB	2	low	0.422779
gstB	Glutathione S-transferase GstB	2	1:1 mix	0.447912
guaA	GMP synthase [glutamine-hydrolyzing]	2	high	0.371005
guaA	GMP synthase [glutamine-hydrolyzing]	2	low	0.599419
guaA	GMP synthase [glutamine-hydrolyzing]	2	1:1 mix	0.578082
guaB	Inosine-5'-monophosphate dehydrogenase	2	high	0.583491
guaB	Inosine-5'-monophosphate dehydrogenase	2	low	0.974847
guaB	Inosine-5'-monophosphate dehydrogenase	2	1:1 mix	0.934604
guaC	GMP reductase	3	low	0.767532
guaC	GMP reductase	3	high	1.22863
guaC	GMP reductase	3	1:1 mix	0.938816
gyrA	DNA gyrase subunit A	2	low	0.400062
gyrA	DNA gyrase subunit A	2	high	0.415029
gyrA	DNA gyrase subunit A	2	1:1 mix	0.455728
gyrB	DNA gyrase subunit B	2	low	0.211412
gyrB	DNA gyrase subunit B	2	high	0.440368
gyrB	DNA gyrase subunit B	2	1:1 mix	0.287233
hcaR	Hca operon transcriptional activator HcaR	2	high	-0.391708
hcaR	Hca operon transcriptional activator HcaR	2	low	0.747031
hcaR	Hca operon transcriptional activator HcaR	2	1:1 mix	0.0844419
hchA	Protein/nucleic acid deglycase 1	3	low	-0.0866793
hchA	Protein/nucleic acid deglycase 1	3	high	1.03768
hchA	Protein/nucleic acid deglycase 1	3	1:1 mix	0.340144
hdeD	Protein HdeD	2	low	0.209506
hdeD	Protein HdeD	2	high	0.684913
hdeD	Protein HdeD	2	1:1 mix	0.305134
hemA	Glutamyl-tRNA reductase	3	high	-0.591342
hemA	Glutamyl-tRNA reductase	3	low	0.0762675
hemA	Glutamyl-tRNA reductase	3	1:1 mix	-0.441585
hemE	Uroporphyrinogen decarboxylase	1	1:1 mix	-0.270969
hemE	Uroporphyrinogen decarboxylase	1	high	-0.563909
hemE	Uroporphyrinogen decarboxylase	1	low	-0.0215517
hemL	Glutamate-1-semialdehyde 2,1-aminomutase	3	low	0.103204
hemL	Glutamate-1-semialdehyde 2,1-aminomutase	3	high	1.3189
hemL	Glutamate-1-semialdehyde 2,1-aminomutase	3	1:1 mix	0.699708
hemN	Oxygen-independent coproporphyrinogen III oxidase	1	1:1 mix	-0.354179
hemN	Oxygen-independent coproporphyrinogen III oxidase	1	high	-0.794169
hemN	Oxygen-independent coproporphyrinogen III oxidase	1	low	-0.3062
hemX	Protein HemX	1	1:1 mix	-0.0475815
hemX	Protein HemX	1	high	-0.378047
hemX	Protein HemX	1	low	0.18876
hflC	Modulator of FtsH protease HflC	2	low	0.324658
hflC	Modulator of FtsH protease HflC	2	high	0.486021
hflC	Modulator of FtsH protease HflC	2	1:1 mix	0.218009
hha	Hemolysin expression-modulating protein Hha	3	low	-0.436455
hha	Hemolysin expression-modulating protein Hha	3	high	0.230109
hha	Hemolysin expression-modulating protein Hha	3	1:1 mix	-0.134997
hicB	Antitoxin HicB	1	1:1 mix	-0.259869
hicB	Antitoxin HicB	1	high	-0.574468
hicB	Antitoxin HicB	1	low	-0.248846
hinT	Purine nucleoside phosphoramidase	4	high	-0.821545
hinT	Purine nucleoside phosphoramidase	4	low	0.019938
hinT	Purine nucleoside phosphoramidase	4	1:1 mix	0.143992
hisB	Histidine biosynthesis bifunctional protein HisB	2	low	0.452447
hisB	Histidine biosynthesis bifunctional protein HisB	2	high	0.667596
hisB	Histidine biosynthesis bifunctional protein HisB	2	1:1 mix	0.438578
hisC	Histidinol-phosphate aminotransferase	2	low	0.268181
hisC	Histidinol-phosphate aminotransferase	2	high	0.646384
hisC	Histidinol-phosphate aminotransferase	2	1:1 mix	0.447016
hisD	Histidinol dehydrogenase	2	low	0.330014
hisD	Histidinol dehydrogenase	2	high	0.640529
hisD	Histidinol dehydrogenase	2	1:1 mix	0.464856
hisI	Histidine biosynthesis bifunctional protein HisIE	2	low	0.418329
hisI	Histidine biosynthesis bifunctional protein HisIE	2	high	0.48466
hisI	Histidine biosynthesis bifunctional protein HisIE	2	1:1 mix	0.375326
hisM	Histidine transport system permease protein HisM	4	high	-1.05418
hisM	Histidine transport system permease protein HisM	4	low	0.363052
hisM	Histidine transport system permease protein HisM	4	1:1 mix	-0.0927758
hisS	Histidine--tRNA ligase	1	1:1 mix	-0.0558991
hisS	Histidine--tRNA ligase	1	high	-0.304611
hisS	Histidine--tRNA ligase	1	low	0.267866
hldD	ADP-L-glycero-D-manno-heptose-6-epimerase	1	1:1 mix	-0.30235
hldD	ADP-L-glycero-D-manno-heptose-6-epimerase	1	high	-0.504087
hldD	ADP-L-glycero-D-manno-heptose-6-epimerase	1	low	-0.327514
hns	DNA-binding protein H-NS	3	low	-0.243005
hns	DNA-binding protein H-NS	3	high	1.01944
hns	DNA-binding protein H-NS	3	1:1 mix	0.223469
hokD	Toxic protein HokD	3	low	-0.62616
hokD	Toxic protein HokD	3	high	0.646515
hokD	Toxic protein HokD	3	1:1 mix	0.0881546
hpf	Ribosome hibernation promoting factor	1	1:1 mix	-0.0746751
hpf	Ribosome hibernation promoting factor	1	high	-0.370254
hpf	Ribosome hibernation promoting factor	1	low	0.0812977
hscA	Chaperone protein HscA	3	low	0.887693
hscA	Chaperone protein HscA	3	high	1.24956
hscA	Chaperone protein HscA	3	1:1 mix	0.782923
hscB	Co-chaperone protein HscB	3	high	0.232421
hscB	Co-chaperone protein HscB	3	low	0.470127
hscB	Co-chaperone protein HscB	3	1:1 mix	-0.0974578
hslJ	Heat shock protein HslJ	3	low	0.250194
hslJ	Heat shock protein HslJ	3	high	1.92954
hslJ	Heat shock protein HslJ	3	1:1 mix	1.03871
hslO	33 kDa chaperonin	3	low	-0.038267
hslO	33 kDa chaperonin	3	high	0.841665
hslO	33 kDa chaperonin	3	1:1 mix	0.559931
hslR	Heat shock protein 15	3	low	-0.109029
hslR	Heat shock protein 15	3	high	0.62544
hslR	Heat shock protein 15	3	1:1 mix	0.402503
hspQ	Heat shock protein HspQ	3	low	-0.686741
hspQ	Heat shock protein HspQ	3	high	0.884661
hspQ	Heat shock protein HspQ	3	1:1 mix	0.279061
hsrA	Probable transport protein HsrA	1	1:1 mix	-0.701381
hsrA	Probable transport protein HsrA	1	high	-1.25165
hsrA	Probable transport protein HsrA	1	low	-0.452567
htpG	Chaperone protein HtpG	3	low	-0.0484004
htpG	Chaperone protein HtpG	3	high	1.28117
htpG	Chaperone protein HtpG	3	1:1 mix	0.762903
htpX	Protease HtpX	5	low	-0.121403
htpX	Protease HtpX	5	high	4.02623
htpX	Protease HtpX	5	1:1 mix	2.75891
hupB	DNA-binding protein HU-beta	2	low	0.612824
hupB	DNA-binding protein HU-beta	2	high	0.716336
hupB	DNA-binding protein HU-beta	2	1:1 mix	0.51074
hycI	Hydrogenase 3 maturation protease	2	low	0.520667
hycI	Hydrogenase 3 maturation protease	2	high	0.781456
hycI	Hydrogenase 3 maturation protease	2	1:1 mix	0.526213
hyi	Hydroxypyruvate isomerase	5	low	-2.4726
hyi	Hydroxypyruvate isomerase	5	high	-1.95631
hyi	Hydroxypyruvate isomerase	5	1:1 mix	-1.44833
ibaG	Acid stress protein IbaG	2	low	0.271612
ibaG	Acid stress protein IbaG	2	high	0.845612
ibaG	Acid stress protein IbaG	2	1:1 mix	0.534767
ibpA	Small heat shock protein IbpA	3	low	-0.456991
ibpA	Small heat shock protein IbpA	3	high	1.40422
ibpA	Small heat shock protein IbpA	3	1:1 mix	0.810627
ibpB	Small heat shock protein IbpB	5	low	-0.696891
ibpB	Small heat shock protein IbpB	5	high	2.10396
ibpB	Small heat shock protein IbpB	5	1:1 mix	1.23483
icd	Isocitrate dehydrogenase [NADP]	2	high	0.244621
icd	Isocitrate dehydrogenase [NADP]	2	low	0.359
icd	Isocitrate dehydrogenase [NADP]	2	1:1 mix	0.291409
iclR	Transcriptional repressor IclR	1	1:1 mix	-0.555216
iclR	Transcriptional repressor IclR	1	high	-1.23764
iclR	Transcriptional repressor IclR	1	low	-0.316093
idi	Isopentenyl-diphosphate Delta-isomerase	1	1:1 mix	-0.534575
idi	Isopentenyl-diphosphate Delta-isomerase	1	high	-1.03522
idi	Isopentenyl-diphosphate Delta-isomerase	1	low	-0.494601
ihfA	Integration host factor subunit alpha	3	low	-0.493865
ihfA	Integration host factor subunit alpha	3	high	0.375283
ihfA	Integration host factor subunit alpha	3	1:1 mix	-0.048254
ileS	Isoleucine--tRNA ligase	2	low	0.178537
ileS	Isoleucine--tRNA ligase	2	high	0.295775
ileS	Isoleucine--tRNA ligase	2	1:1 mix	0.265149
ilvB	Acetolactate synthase isozyme 1 large subunit	2	high	0.0815598
ilvB	Acetolactate synthase isozyme 1 large subunit	2	low	0.440065
ilvB	Acetolactate synthase isozyme 1 large subunit	2	1:1 mix	0.127196
ilvD	Dihydroxy-acid dehydratase	2	high	0.3021
ilvD	Dihydroxy-acid dehydratase	2	low	0.557505
ilvD	Dihydroxy-acid dehydratase	2	1:1 mix	0.212462
ilvG	Putative acetolactate synthase isozyme 2 large subunit	2	low	0.409868
ilvG	Putative acetolactate synthase isozyme 2 large subunit	2	high	0.624802
ilvG	Putative acetolactate synthase isozyme 2 large subunit	2	1:1 mix	0.276213
infB	Translation initiation factor IF-2	1	1:1 mix	-0.25606
infB	Translation initiation factor IF-2	1	high	-0.27839
infB	Translation initiation factor IF-2	1	low	-0.170754
infC	Translation initiation factor IF-3	2	low	0.190542
infC	Translation initiation factor IF-3	2	high	0.7812
infC	Translation initiation factor IF-3	2	1:1 mix	0.447902
insC1	Transposase InsC for insertion element IS2A	1	1:1 mix	-0.116777
insC1	Transposase InsC for insertion element IS2A	1	high	-0.34283
insC1	Transposase InsC for insertion element IS2A	1	low	-0.156181
insD1	Transposase InsD for insertion element IS2A	1	1:1 mix	-0.272139
insD1	Transposase InsD for insertion element IS2A	1	high	-0.609924
insD1	Transposase InsD for insertion element IS2A	1	low	-0.235934
insI1	Transposase InsI for insertion sequence element IS30A	1	1:1 mix	-0.586128
insI1	Transposase InsI for insertion sequence element IS30A	1	high	-0.735807
insI1	Transposase InsI for insertion sequence element IS30A	1	low	-0.356853
insL1	Putative transposase InsL for insertion sequence element IS186A	3	low	-0.145687
insL1	Putative transposase InsL for insertion sequence element IS186A	3	high	0.789229
insL1	Putative transposase InsL for insertion sequence element IS186A	3	1:1 mix	0.466006
insN		1	1:1 mix	-0.353097
insN		1	high	-0.578499
insN		1	low	-0.361296
insQ	Putative transposase InsQ for insertion sequence element IS609	1	1:1 mix	-0.374514
insQ	Putative transposase InsQ for insertion sequence element IS609	1	high	-0.598538
insQ	Putative transposase InsQ for insertion sequence element IS609	1	low	-0.116625
insX		5	low	0.759416
insX		5	high	1.04899
insX		5	1:1 mix	1.39384
intB	Putative protein IntB	1	1:1 mix	-0.101653
intB	Putative protein IntB	1	high	-0.558356
intB	Putative protein IntB	1	low	-0.228578
intD	Prophage integrase IntD	1	1:1 mix	-0.379364
intD	Prophage integrase IntD	1	high	-0.69807
intD	Prophage integrase IntD	1	low	-0.205997
iraD	Anti-adapter protein IraD	3	low	-0.913456
iraD	Anti-adapter protein IraD	3	high	0.0996938
iraD	Anti-adapter protein IraD	3	1:1 mix	-0.34022
iscA	Iron-binding protein IscA	3	high	0.326299
iscA	Iron-binding protein IscA	3	low	0.447771
iscA	Iron-binding protein IscA	3	1:1 mix	0.132794
iscR	HTH-type transcriptional regulator IscR	2	high	0.143741
iscR	HTH-type transcriptional regulator IscR	2	low	0.386768
iscR	HTH-type transcriptional regulator IscR	2	1:1 mix	0.203401
iscS	Cysteine desulfurase IscS	2	high	0.318132
iscS	Cysteine desulfurase IscS	2	low	0.539588
iscS	Cysteine desulfurase IscS	2	1:1 mix	0.24076
iscU	Iron-sulfur cluster assembly scaffold protein IscU	2	high	0.311095
iscU	Iron-sulfur cluster assembly scaffold protein IscU	2	low	0.463203
iscU	Iron-sulfur cluster assembly scaffold protein IscU	2	1:1 mix	0.152125
iscX	Protein IscX	3	low	0.749954
iscX	Protein IscX	3	high	1.22312
iscX	Protein IscX	3	1:1 mix	0.742794
ispA	Farnesyl diphosphate synthase	3	low	0.657724
ispA	Farnesyl diphosphate synthase	3	high	1.95763
ispA	Farnesyl diphosphate synthase	3	1:1 mix	1.27124
ispB	Octaprenyl diphosphate synthase	1	1:1 mix	0.0255661
ispB	Octaprenyl diphosphate synthase	1	high	-0.317595
ispB	Octaprenyl diphosphate synthase	1	low	0.0512038
ispH	4-hydroxy-3-methylbut-2-enyl diphosphate reductase	2	low	0.14273
ispH	4-hydroxy-3-methylbut-2-enyl diphosphate reductase	2	high	1.05305
ispH	4-hydroxy-3-methylbut-2-enyl diphosphate reductase	2	1:1 mix	0.5474
ivy	Inhibitor of vertebrate lysozyme	3	low	0.389591
ivy	Inhibitor of vertebrate lysozyme	3	high	3.10317
ivy	Inhibitor of vertebrate lysozyme	3	1:1 mix	1.88659
katE	Catalase HPII	3	low	-0.199795
katE	Catalase HPII	3	high	0.409088
katE	Catalase HPII	3	1:1 mix	0.110003
katG	Catalase-peroxidase	3	low	0.240564
katG	Catalase-peroxidase	3	high	1.50146
katG	Catalase-peroxidase	3	1:1 mix	0.732999
kch	Voltage-gated potassium channel Kch	1	1:1 mix	-0.561513
kch	Voltage-gated potassium channel Kch	1	high	-0.941873
kch	Voltage-gated potassium channel Kch	1	low	-0.299035
kdpA	Potassium-transporting ATPase potassium-binding subunit	5	low	0.00255009
kdpA	Potassium-transporting ATPase potassium-binding subunit	5	high	1.94884
kdpA	Potassium-transporting ATPase potassium-binding subunit	5	1:1 mix	1.47719
kdpB	Potassium-transporting ATPase ATP-binding subunit	3	low	1.11613
kdpB	Potassium-transporting ATPase ATP-binding subunit	3	high	1.90434
kdpB	Potassium-transporting ATPase ATP-binding subunit	3	1:1 mix	0.992067
kdpC	Potassium-transporting ATPase KdpC subunit	2	low	-0.0308133
kdpC	Potassium-transporting ATPase KdpC subunit	2	high	0.984465
kdpC	Potassium-transporting ATPase KdpC subunit	2	1:1 mix	0.177391
kdpD	Sensor protein KdpD	2	low	0.132046
kdpD	Sensor protein KdpD	2	high	0.925307
kdpD	Sensor protein KdpD	2	1:1 mix	0.523278
kdsC	3-deoxy-D-manno-octulosonate 8-phosphate phosphatase KdsC	1	1:1 mix	-0.299237
kdsC	3-deoxy-D-manno-octulosonate 8-phosphate phosphatase KdsC	1	high	-0.498945
kdsC	3-deoxy-D-manno-octulosonate 8-phosphate phosphatase KdsC	1	low	-0.297875
kefB	Glutathione-regulated potassium-efflux system protein KefB	2	low	0.337062
kefB	Glutathione-regulated potassium-efflux system protein KefB	2	high	0.621548
kefB	Glutathione-regulated potassium-efflux system protein KefB	2	1:1 mix	0.494837
kefC	Glutathione-regulated potassium-efflux system protein KefC	2	low	0.320987
kefC	Glutathione-regulated potassium-efflux system protein KefC	2	high	0.654713
kefC	Glutathione-regulated potassium-efflux system protein KefC	2	1:1 mix	0.438115
kefG	Glutathione-regulated potassium-efflux system ancillary protein KefG	2	low	0.149112
kefG	Glutathione-regulated potassium-efflux system ancillary protein KefG	2	high	0.619856
kefG	Glutathione-regulated potassium-efflux system ancillary protein KefG	2	1:1 mix	0.418118
kup	Low affinity potassium transport system protein kup	1	1:1 mix	-0.688625
kup	Low affinity potassium transport system protein kup	1	high	-0.973064
kup	Low affinity potassium transport system protein kup	1	low	-0.519008
ldhA	D-lactate dehydrogenase	3	low	-0.236327
ldhA	D-lactate dehydrogenase	3	high	0.612068
ldhA	D-lactate dehydrogenase	3	1:1 mix	0.248775
ldtA		1	1:1 mix	-0.626426
ldtA		1	high	-0.927704
ldtA		1	low	-0.722168
ldtB		3	low	0.463505
ldtB		3	high	2.3091
ldtB		3	1:1 mix	1.42767
ldtC		3	low	0.0695049
ldtC		3	high	1.59822
ldtC		3	1:1 mix	0.970596
ldtD		3	low	-0.477714
ldtD		3	high	1.39284
ldtD		3	1:1 mix	0.614364
ldtE		3	low	-0.861822
ldtE		3	high	-0.265871
ldtE		3	1:1 mix	-0.360062
lepA	Elongation factor 4	1	1:1 mix	-0.371271
lepA	Elongation factor 4	1	high	-0.617887
lepA	Elongation factor 4	1	low	0.0140394
lepB	Signal peptidase I	1	1:1 mix	-0.367434
lepB	Signal peptidase I	1	high	-0.439509
lepB	Signal peptidase I	1	low	-0.0744746
leuB	3-isopropylmalate dehydrogenase	2	low	0.149007
leuB	3-isopropylmalate dehydrogenase	2	high	0.606018
leuB	3-isopropylmalate dehydrogenase	2	1:1 mix	0.364005
leuC	3-isopropylmalate dehydratase large subunit	2	low	0.216252
leuC	3-isopropylmalate dehydratase large subunit	2	high	0.427649
leuC	3-isopropylmalate dehydratase large subunit	2	1:1 mix	0.322339
leuE	Leucine efflux protein	4	high	-1.97347
leuE	Leucine efflux protein	4	low	-0.568128
leuE	Leucine efflux protein	4	1:1 mix	-1.32701
leuS	Leucine--tRNA ligase	2	high	0.401167
leuS	Leucine--tRNA ligase	2	low	0.484474
leuS	Leucine--tRNA ligase	2	1:1 mix	0.474228
lexA	LexA repressor	3	low	-0.57109
lexA	LexA repressor	3	high	0.146072
lexA	LexA repressor	3	1:1 mix	-0.215681
lhr	Probable ATP-dependent helicase lhr	3	low	0.326992
lhr	Probable ATP-dependent helicase lhr	3	high	0.594263
lhr	Probable ATP-dependent helicase lhr	3	1:1 mix	0.142166
ligB	DNA ligase B	4	high	-1.4252
ligB	DNA ligase B	4	low	-0.169475
ligB	DNA ligase B	4	1:1 mix	-0.783274
lipA	Lipoyl synthase	2	high	0.16323
lipA	Lipoyl synthase	2	low	0.419769
lipA	Lipoyl synthase	2	1:1 mix	0.121702
lldR	Putative L-lactate dehydrogenase operon regulatory protein	1	1:1 mix	-0.246912
lldR	Putative L-lactate dehydrogenase operon regulatory protein	1	high	-0.666092
lldR	Putative L-lactate dehydrogenase operon regulatory protein	1	low	0.258958
loiP	Metalloprotease LoiP	3	low	0.0580674
loiP	Metalloprotease LoiP	3	high	1.9673
loiP	Metalloprotease LoiP	3	1:1 mix	1.01928
lolA	Outer-membrane lipoprotein carrier protein	2	low	0.256895
lolA	Outer-membrane lipoprotein carrier protein	2	high	1.03473
lolA	Outer-membrane lipoprotein carrier protein	2	1:1 mix	0.534057
lolC	Lipoprotein-releasing system transmembrane protein LolC	3	high	0.389687
lolC	Lipoprotein-releasing system transmembrane protein LolC	3	low	0.789649
lolC	Lipoprotein-releasing system transmembrane protein LolC	3	1:1 mix	0.325843
lon	Lon protease	3	low	-0.105963
lon	Lon protease	3	high	0.347796
lon	Lon protease	3	1:1 mix	0.249026
lplT	Lysophospholipid transporter LplT	1	1:1 mix	-0.350813
lplT	Lysophospholipid transporter LplT	1	high	-0.395286
lplT	Lysophospholipid transporter LplT	1	low	-0.354419
lpoA	Penicillin-binding protein activator LpoA	2	high	0.00912896
lpoA	Penicillin-binding protein activator LpoA	2	low	0.348888
lpoA	Penicillin-binding protein activator LpoA	2	1:1 mix	0.228492
lpoB	Penicillin-binding protein activator LpoB	1	1:1 mix	-0.213978
lpoB	Penicillin-binding protein activator LpoB	1	low	-0.36234
lpoB	Penicillin-binding protein activator LpoB	1	high	-0.160777
lptA	Lipopolysaccharide export system protein LptA	1	1:1 mix	-0.389932
lptA	Lipopolysaccharide export system protein LptA	1	high	-0.728038
lptA	Lipopolysaccharide export system protein LptA	1	low	-0.341425
lptB	Lipopolysaccharide export system ATP-binding protein LptB	1	1:1 mix	-0.271631
lptB	Lipopolysaccharide export system ATP-binding protein LptB	1	high	-0.694723
lptB	Lipopolysaccharide export system ATP-binding protein LptB	1	low	-0.211508
lptC	Lipopolysaccharide export system protein LptC	1	1:1 mix	-0.389685
lptC	Lipopolysaccharide export system protein LptC	1	high	-0.537061
lptC	Lipopolysaccharide export system protein LptC	1	low	-0.308849
lptD	LPS-assembly protein LptD	1	1:1 mix	-0.232619
lptD	LPS-assembly protein LptD	1	high	-0.545919
lptD	LPS-assembly protein LptD	1	low	-0.102411
lptE	LPS-assembly lipoprotein LptE	2	low	0.379174
lptE	LPS-assembly lipoprotein LptE	2	high	0.525985
lptE	LPS-assembly lipoprotein LptE	2	1:1 mix	0.355513
lptG	Lipopolysaccharide export system permease protein LptG	2	low	0.123801
lptG	Lipopolysaccharide export system permease protein LptG	2	high	0.503386
lptG	Lipopolysaccharide export system permease protein LptG	2	1:1 mix	0.396575
lpxA	Acyl-[acyl-carrier-protein]--UDP-N-acetylglucosamine O-acyltransferase	2	high	0.161414
lpxA	Acyl-[acyl-carrier-protein]--UDP-N-acetylglucosamine O-acyltransferase	2	low	0.450982
lpxA	Acyl-[acyl-carrier-protein]--UDP-N-acetylglucosamine O-acyltransferase	2	1:1 mix	0.162539
lpxC	UDP-3-O-acyl-N-acetylglucosamine deacetylase	3	low	0.377298
lpxC	UDP-3-O-acyl-N-acetylglucosamine deacetylase	3	high	2.3842
lpxC	UDP-3-O-acyl-N-acetylglucosamine deacetylase	3	1:1 mix	1.4806
lrhA	Probable HTH-type transcriptional regulator LrhA	2	low	0.0270975
lrhA	Probable HTH-type transcriptional regulator LrhA	2	high	1.24943
lrhA	Probable HTH-type transcriptional regulator LrhA	2	1:1 mix	0.42451
lrp	Leucine-responsive regulatory protein	2	high	0.500404
lrp	Leucine-responsive regulatory protein	2	low	0.508528
lrp	Leucine-responsive regulatory protein	2	1:1 mix	0.506965
lspA	Lipoprotein signal peptidase	3	low	0.411848
lspA	Lipoprotein signal peptidase	3	high	1.74614
lspA	Lipoprotein signal peptidase	3	1:1 mix	1.05851
luxS	S-ribosylhomocysteine lyase	1	1:1 mix	-0.405104
luxS	S-ribosylhomocysteine lyase	1	high	-0.645336
luxS	S-ribosylhomocysteine lyase	1	low	-0.438959
lysP	Lysine-specific permease	1	1:1 mix	-0.289391
lysP	Lysine-specific permease	1	high	-0.579667
lysP	Lysine-specific permease	1	low	-0.406322
lysS	Lysine--tRNA ligase	2	high	0.309474
lysS	Lysine--tRNA ligase	2	low	0.555238
lysS	Lysine--tRNA ligase	2	1:1 mix	0.318198
macB	Macrolide export ATP-binding/permease protein MacB	2	low	0.149844
macB	Macrolide export ATP-binding/permease protein MacB	2	high	0.321508
macB	Macrolide export ATP-binding/permease protein MacB	2	1:1 mix	0.245229
maeA	NAD-dependent malic enzyme	3	low	0.106206
maeA	NAD-dependent malic enzyme	3	high	1.0077
maeA	NAD-dependent malic enzyme	3	1:1 mix	0.530804
maeB	NADP-dependent malic enzyme	2	high	0.180268
maeB	NADP-dependent malic enzyme	2	low	0.3997
maeB	NADP-dependent malic enzyme	2	1:1 mix	0.183506
mak	Fructokinase	3	low	0.609996
mak	Fructokinase	3	high	1.20998
mak	Fructokinase	3	1:1 mix	0.727179
malP	Maltodextrin phosphorylase	1	1:1 mix	-0.430481
malP	Maltodextrin phosphorylase	1	high	-0.451143
malP	Maltodextrin phosphorylase	1	low	-0.424855
malQ	4-alpha-glucanotransferase	1	1:1 mix	-0.300218
malQ	4-alpha-glucanotransferase	1	high	-0.506506
malQ	4-alpha-glucanotransferase	1	low	-0.358396
malT	HTH-type transcriptional regulator MalT	4	high	-1.0823
malT	HTH-type transcriptional regulator MalT	4	low	-0.162718
malT	HTH-type transcriptional regulator MalT	4	1:1 mix	-0.850443
manA	Mannose-6-phosphate isomerase	3	low	0.706541
manA	Mannose-6-phosphate isomerase	3	high	2.03787
manA	Mannose-6-phosphate isomerase	3	1:1 mix	1.31943
manX	PTS system mannose-specific EIIAB component	1	1:1 mix	-0.683198
manX	PTS system mannose-specific EIIAB component	1	high	-0.886952
manX	PTS system mannose-specific EIIAB component	1	low	-0.729118
manY	PTS system mannose-specific EIIC component	1	1:1 mix	-0.518208
manY	PTS system mannose-specific EIIC component	1	high	-0.731954
manY	PTS system mannose-specific EIIC component	1	low	-0.521322
manZ	PTS system mannose-specific EIID component	1	1:1 mix	-0.596836
manZ	PTS system mannose-specific EIID component	1	high	-0.800059
manZ	PTS system mannose-specific EIID component	1	low	-0.766642
map	Methionine aminopeptidase	2	low	0.418759
map	Methionine aminopeptidase	2	high	0.502044
map	Methionine aminopeptidase	2	1:1 mix	0.464988
marC	UPF0056 inner membrane protein MarC	1	1:1 mix	-0.55547
marC	UPF0056 inner membrane protein MarC	1	high	-0.613958
marC	UPF0056 inner membrane protein MarC	1	low	-0.328513
mazG	Nucleoside triphosphate pyrophosphohydrolase	1	1:1 mix	-0.366369
mazG	Nucleoside triphosphate pyrophosphohydrolase	1	high	-1.0186
mazG	Nucleoside triphosphate pyrophosphohydrolase	1	low	-0.257082
mcbA	Uncharacterized protein McbA	3	low	-0.0252684
mcbA	Uncharacterized protein McbA	3	high	1.22454
mcbA	Uncharacterized protein McbA	3	1:1 mix	0.583268
mcbR	HTH-type transcriptional regulator McbR	4	high	-1.44529
mcbR	HTH-type transcriptional regulator McbR	4	low	-0.644167
mcbR	HTH-type transcriptional regulator McbR	4	1:1 mix	-1.0599
mdfA	Multidrug transporter MdfA	1	1:1 mix	-0.454848
mdfA	Multidrug transporter MdfA	1	high	-1.05579
mdfA	Multidrug transporter MdfA	1	low	-0.574191
mdh	Malate dehydrogenase	2	high	0.2315
mdh	Malate dehydrogenase	2	low	0.391561
mdh	Malate dehydrogenase	2	1:1 mix	0.437324
mdlA	Multidrug resistance-like ATP-binding protein MdlA	1	1:1 mix	-0.23383
mdlA	Multidrug resistance-like ATP-binding protein MdlA	1	high	-0.560046
mdlA	Multidrug resistance-like ATP-binding protein MdlA	1	low	-0.397126
mdtA	Multidrug resistance protein MdtA	2	low	0.10506
mdtA	Multidrug resistance protein MdtA	2	high	0.453067
mdtA	Multidrug resistance protein MdtA	2	1:1 mix	0.137002
mdtE	Multidrug resistance protein MdtE	1	1:1 mix	-0.567455
mdtE	Multidrug resistance protein MdtE	1	high	-1.17366
mdtE	Multidrug resistance protein MdtE	1	low	-0.259098
mdtF	Multidrug resistance protein MdtF	1	1:1 mix	-0.633525
mdtF	Multidrug resistance protein MdtF	1	high	-0.870413
mdtF	Multidrug resistance protein MdtF	1	low	-0.321542
mdtG	Multidrug resistance protein MdtG	1	1:1 mix	-0.641647
mdtG	Multidrug resistance protein MdtG	1	high	-0.57453
mdtG	Multidrug resistance protein MdtG	1	low	-0.561141
mdtK	Multidrug resistance protein MdtK	2	low	0.183009
mdtK	Multidrug resistance protein MdtK	2	high	0.745814
mdtK	Multidrug resistance protein MdtK	2	1:1 mix	0.407007
mdtL	Multidrug resistance protein MdtL	4	high	-1.7062
mdtL	Multidrug resistance protein MdtL	4	low	-0.331285
mdtL	Multidrug resistance protein MdtL	4	1:1 mix	-0.138347
mdtM	Multidrug resistance protein MdtM	4	high	-1.98536
mdtM	Multidrug resistance protein MdtM	4	low	-0.699374
mdtM	Multidrug resistance protein MdtM	4	1:1 mix	-0.87192
menD	2-succinyl-5-enolpyruvyl-6-hydroxy-3-cyclohexene-1-carboxylate synthase	4	high	-0.936743
menD	2-succinyl-5-enolpyruvyl-6-hydroxy-3-cyclohexene-1-carboxylate synthase	4	low	-0.187864
menD	2-succinyl-5-enolpyruvyl-6-hydroxy-3-cyclohexene-1-carboxylate synthase	4	1:1 mix	-0.810332
menF	Isochorismate synthase MenF	1	1:1 mix	-0.688947
menF	Isochorismate synthase MenF	1	high	-0.900033
menF	Isochorismate synthase MenF	1	low	-0.375491
menH	2-succinyl-6-hydroxy-2,4-cyclohexadiene-1-carboxylate synthase	1	1:1 mix	-0.549451
menH	2-succinyl-6-hydroxy-2,4-cyclohexadiene-1-carboxylate synthase	1	high	-0.748778
menH	2-succinyl-6-hydroxy-2,4-cyclohexadiene-1-carboxylate synthase	1	low	-0.417663
mepM	Murein DD-endopeptidase MepM	3	low	1.36005
mepM	Murein DD-endopeptidase MepM	3	high	1.5253
mepM	Murein DD-endopeptidase MepM	3	1:1 mix	1.39913
metB	Cystathionine gamma-synthase	2	low	0.653002
metB	Cystathionine gamma-synthase	2	high	0.991256
metB	Cystathionine gamma-synthase	2	1:1 mix	0.72479
metC	Cystathionine beta-lyase MetC	1	1:1 mix	-0.425164
metC	Cystathionine beta-lyase MetC	1	high	-0.592316
metC	Cystathionine beta-lyase MetC	1	low	-0.307622
metE	5-methyltetrahydropteroyltriglutamate--homocysteine methyltransferase	3	low	-0.705096
metE	5-methyltetrahydropteroyltriglutamate--homocysteine methyltransferase	3	high	0.484818
metE	5-methyltetrahydropteroyltriglutamate--homocysteine methyltransferase	3	1:1 mix	0.0158461
metF	5,10-methylenetetrahydrofolate reductase	5	low	-0.0638319
metF	5,10-methylenetetrahydrofolate reductase	5	high	5.43609
metF	5,10-methylenetetrahydrofolate reductase	5	1:1 mix	4.06441
metG	Methionine--tRNA ligase	2	low	0.563999
metG	Methionine--tRNA ligase	2	high	0.564291
metG	Methionine--tRNA ligase	2	1:1 mix	0.661851
metH	Methionine synthase	2	high	0.0784069
metH	Methionine synthase	2	low	0.644831
metH	Methionine synthase	2	1:1 mix	0.278555
metJ	Met repressor	3	low	-0.200893
metJ	Met repressor	3	high	1.34033
metJ	Met repressor	3	1:1 mix	0.613762
metK	S-adenosylmethionine synthase	3	low	-0.168974
metK	S-adenosylmethionine synthase	3	high	1.82819
metK	S-adenosylmethionine synthase	3	1:1 mix	0.584904
metN	Methionine import ATP-binding protein MetN	3	low	-0.0613955
metN	Methionine import ATP-binding protein MetN	3	high	0.881776
metN	Methionine import ATP-binding protein MetN	3	1:1 mix	0.296291
metR	HTH-type transcriptional regulator MetR	5	low	-0.847795
metR	HTH-type transcriptional regulator MetR	5	high	4.45399
metR	HTH-type transcriptional regulator MetR	5	1:1 mix	2.99489
mfd	Transcription-repair-coupling factor	3	low	0.14112
mfd	Transcription-repair-coupling factor	3	high	0.752388
mfd	Transcription-repair-coupling factor	3	1:1 mix	0.547704
mgrB	PhoP/PhoQ regulator MgrB	5	low	1.56917
mgrB	PhoP/PhoQ regulator MgrB	5	high	4.68804
mgrB	PhoP/PhoQ regulator MgrB	5	1:1 mix	3.80076
mgsA	Methylglyoxal synthase	2	low	0.151598
mgsA	Methylglyoxal synthase	2	high	0.618373
mgsA	Methylglyoxal synthase	2	1:1 mix	0.300239
mgtA	Magnesium-transporting ATPase, P-type 1	5	low	2.35721
mgtA	Magnesium-transporting ATPase, P-type 1	5	high	6.98524
mgtA	Magnesium-transporting ATPase, P-type 1	5	1:1 mix	5.88342
miaA	tRNA dimethylallyltransferase	3	low	-0.211078
miaA	tRNA dimethylallyltransferase	3	high	0.372034
miaA	tRNA dimethylallyltransferase	3	1:1 mix	0.174285
mioC	Protein MioC	2	high	0.224055
mioC	Protein MioC	2	low	0.788365
mioC	Protein MioC	2	1:1 mix	0.60064
mlaB	Intermembrane phospholipid transport system binding protein MlaB	3	low	0.352133
mlaB	Intermembrane phospholipid transport system binding protein MlaB	3	high	2.07721
mlaB	Intermembrane phospholipid transport system binding protein MlaB	3	1:1 mix	1.22963
mlaC	Intermembrane phospholipid transport system binding protein MlaC	3	low	0.191754
mlaC	Intermembrane phospholipid transport system binding protein MlaC	3	high	1.80803
mlaC	Intermembrane phospholipid transport system binding protein MlaC	3	1:1 mix	1.0656
mlaD	Intermembrane phospholipid transport system binding protein MlaD	3	low	0.508074
mlaD	Intermembrane phospholipid transport system binding protein MlaD	3	high	1.8665
mlaD	Intermembrane phospholipid transport system binding protein MlaD	3	1:1 mix	1.30345
mlaE	Intermembrane phospholipid transport system permease protein MlaE	3	low	0.699868
mlaE	Intermembrane phospholipid transport system permease protein MlaE	3	high	2.24155
mlaE	Intermembrane phospholipid transport system permease protein MlaE	3	1:1 mix	1.4377
mlaF	Intermembrane phospholipid transport system ATP-binding protein MlaF	3	low	0.816845
mlaF	Intermembrane phospholipid transport system ATP-binding protein MlaF	3	high	2.59301
mlaF	Intermembrane phospholipid transport system ATP-binding protein MlaF	3	1:1 mix	1.75063
mliC	Membrane-bound lysozyme inhibitor of C-type lysozyme	3	low	0.827789
mliC	Membrane-bound lysozyme inhibitor of C-type lysozyme	3	high	2.57032
mliC	Membrane-bound lysozyme inhibitor of C-type lysozyme	3	1:1 mix	1.79401
mlrA	HTH-type transcriptional regulator MlrA	4	high	-1.5369
mlrA	HTH-type transcriptional regulator MlrA	4	low	-0.516726
mlrA	HTH-type transcriptional regulator MlrA	4	1:1 mix	-0.794557
mltA	Membrane-bound lytic murein transglycosylase A	2	low	0.104754
mltA	Membrane-bound lytic murein transglycosylase A	2	high	0.613474
mltA	Membrane-bound lytic murein transglycosylase A	2	1:1 mix	0.272084
mltB	Membrane-bound lytic murein transglycosylase B	1	1:1 mix	-0.202225
mltB	Membrane-bound lytic murein transglycosylase B	1	high	-0.564528
mltB	Membrane-bound lytic murein transglycosylase B	1	low	-0.060287
mltC	Membrane-bound lytic murein transglycosylase C	3	low	0.467528
mltC	Membrane-bound lytic murein transglycosylase C	3	high	1.08473
mltC	Membrane-bound lytic murein transglycosylase C	3	1:1 mix	0.314675
mltD	Membrane-bound lytic murein transglycosylase D	3	low	0.48192
mltD	Membrane-bound lytic murein transglycosylase D	3	high	0.63737
mltD	Membrane-bound lytic murein transglycosylase D	3	1:1 mix	0.25938
mmuM	Homocysteine S-methyltransferase	3	low	0.617719
mmuM	Homocysteine S-methyltransferase	3	high	0.638163
mmuM	Homocysteine S-methyltransferase	3	1:1 mix	0.378159
mnmA	tRNA-specific 2-thiouridylase MnmA	2	high	0.078467
mnmA	tRNA-specific 2-thiouridylase MnmA	2	low	0.518023
mnmA	tRNA-specific 2-thiouridylase MnmA	2	1:1 mix	0.371485
mntH	Divalent metal cation transporter MntH	1	1:1 mix	-0.517614
mntH	Divalent metal cation transporter MntH	1	high	-0.954477
mntH	Divalent metal cation transporter MntH	1	low	-0.631357
mntR	Transcriptional regulator MntR	1	1:1 mix	-0.260487
mntR	Transcriptional regulator MntR	1	high	-0.626762
mntR	Transcriptional regulator MntR	1	low	-0.0628935
moaA	GTP 3',8-cyclase	1	1:1 mix	-0.459918
moaA	GTP 3',8-cyclase	1	high	-0.671559
moaA	GTP 3',8-cyclase	1	low	-0.308863
moaE	Molybdopterin synthase catalytic subunit	3	low	-0.637526
moaE	Molybdopterin synthase catalytic subunit	3	high	-0.0676756
moaE	Molybdopterin synthase catalytic subunit	3	1:1 mix	-0.489011
mocA	Molybdenum cofactor cytidylyltransferase	4	high	-1.91051
mocA	Molybdenum cofactor cytidylyltransferase	4	low	-0.475229
mocA	Molybdenum cofactor cytidylyltransferase	4	1:1 mix	-0.9915
modC	Molybdenum import ATP-binding protein ModC	3	low	0.713486
modC	Molybdenum import ATP-binding protein ModC	3	high	1.04761
modC	Molybdenum import ATP-binding protein ModC	3	1:1 mix	0.394536
mpl	UDP-N-acetylmuramate--L-alanyl-gamma-D-glutamyl-meso-2,6-diaminoheptandioate ligase	2	low	0.489962
mpl	UDP-N-acetylmuramate--L-alanyl-gamma-D-glutamyl-meso-2,6-diaminoheptandioate ligase	2	high	0.994865
mpl	UDP-N-acetylmuramate--L-alanyl-gamma-D-glutamyl-meso-2,6-diaminoheptandioate ligase	2	1:1 mix	0.603115
mppA	Periplasmic murein peptide-binding protein	1	1:1 mix	-0.320182
mppA	Periplasmic murein peptide-binding protein	1	high	-0.954858
mppA	Periplasmic murein peptide-binding protein	1	low	-0.218218
mqsA	Antitoxin MqsA	3	low	-1.0881
mqsA	Antitoxin MqsA	3	high	0.105928
mqsA	Antitoxin MqsA	3	1:1 mix	-0.547794
mqsR	mRNA interferase toxin MqsR	3	low	-1.29334
mqsR	mRNA interferase toxin MqsR	3	high	0.162879
mqsR	mRNA interferase toxin MqsR	3	1:1 mix	-0.478966
mraZ	Transcriptional regulator MraZ	2	high	0.387418
mraZ	Transcriptional regulator MraZ	2	low	0.523087
mraZ	Transcriptional regulator MraZ	2	1:1 mix	0.249594
mrcB	Penicillin-binding protein 1B	3	low	0.409102
mrcB	Penicillin-binding protein 1B	3	high	1.60844
mrcB	Penicillin-binding protein 1B	3	1:1 mix	0.718809
mreB	Cell shape-determining protein MreB	2	high	0.553113
mreB	Cell shape-determining protein MreB	2	low	0.560839
mreB	Cell shape-determining protein MreB	2	1:1 mix	0.3895
mreC	Cell shape-determining protein MreC	2	high	0.260097
mreC	Cell shape-determining protein MreC	2	low	0.57776
mreC	Cell shape-determining protein MreC	2	1:1 mix	0.337884
mreD	Rod shape-determining protein MreD	1	1:1 mix	-0.517809
mreD	Rod shape-determining protein MreD	1	high	-0.712569
mreD	Rod shape-determining protein MreD	1	low	-0.310214
msbA	ATP-dependent lipid A-core flippase	2	high	0.0672414
msbA	ATP-dependent lipid A-core flippase	2	low	0.58502
msbA	ATP-dependent lipid A-core flippase	2	1:1 mix	0.552061
mscK	Mechanosensitive channel MscK	3	low	1.00134
mscK	Mechanosensitive channel MscK	3	high	2.12812
mscK	Mechanosensitive channel MscK	3	1:1 mix	1.3876
msrA	Peptide methionine sulfoxide reductase MsrA	1	1:1 mix	-0.213295
msrA	Peptide methionine sulfoxide reductase MsrA	1	high	-0.545995
msrA	Peptide methionine sulfoxide reductase MsrA	1	low	-0.35592
msrC	Free methionine-R-sulfoxide reductase	1	1:1 mix	-0.370981
msrC	Free methionine-R-sulfoxide reductase	1	high	-0.430341
msrC	Free methionine-R-sulfoxide reductase	1	low	0.0138395
msyB	Acidic protein MsyB	3	low	-0.222063
msyB	Acidic protein MsyB	3	high	1.0063
msyB	Acidic protein MsyB	3	1:1 mix	0.399451
mtgA	Biosynthetic peptidoglycan transglycosylase	3	low	-0.0382316
mtgA	Biosynthetic peptidoglycan transglycosylase	3	high	0.554579
mtgA	Biosynthetic peptidoglycan transglycosylase	3	1:1 mix	0.0336509
mtlA	PTS system mannitol-specific EIICBA component	4	high	-1.33549
mtlA	PTS system mannitol-specific EIICBA component	4	low	-0.974117
mtlA	PTS system mannitol-specific EIICBA component	4	1:1 mix	-1.37308
mtlD	Mannitol-1-phosphate 5-dehydrogenase	4	high	-1.48218
mtlD	Mannitol-1-phosphate 5-dehydrogenase	4	low	-0.938643
mtlD	Mannitol-1-phosphate 5-dehydrogenase	4	1:1 mix	-1.26927
mtlR	Mannitol operon repressor	4	high	-1.66235
mtlR	Mannitol operon repressor	4	low	-0.990497
mtlR	Mannitol operon repressor	4	1:1 mix	-1.45846
mtn	5'-methylthioadenosine/S-adenosylhomocysteine nucleosidase	2	low	0.465738
mtn	5'-methylthioadenosine/S-adenosylhomocysteine nucleosidase	2	high	0.471128
mtn	5'-methylthioadenosine/S-adenosylhomocysteine nucleosidase	2	1:1 mix	0.44521
mug	G/U mismatch-specific DNA glycosylase	2	low	0.135742
mug	G/U mismatch-specific DNA glycosylase	2	high	1.07536
mug	G/U mismatch-specific DNA glycosylase	2	1:1 mix	0.494438
mukB	Chromosome partition protein MukB	2	high	0.461298
mukB	Chromosome partition protein MukB	2	low	0.5067
mukB	Chromosome partition protein MukB	2	1:1 mix	0.317681
mukE	Chromosome partition protein MukE	3	high	0.607247
mukE	Chromosome partition protein MukE	3	low	0.732016
mukE	Chromosome partition protein MukE	3	1:1 mix	0.367525
mukF	Chromosome partition protein MukF	3	high	-0.0119753
mukF	Chromosome partition protein MukF	3	low	0.520607
mukF	Chromosome partition protein MukF	3	1:1 mix	0.0615424
murA	UDP-N-acetylglucosamine 1-carboxyvinyltransferase	3	low	0.606412
murA	UDP-N-acetylglucosamine 1-carboxyvinyltransferase	3	high	1.23828
murA	UDP-N-acetylglucosamine 1-carboxyvinyltransferase	3	1:1 mix	0.777064
mutL	DNA mismatch repair protein MutL	2	high	0.375668
mutL	DNA mismatch repair protein MutL	2	low	0.382661
mutL	DNA mismatch repair protein MutL	2	1:1 mix	0.168066
mutM	Formamidopyrimidine-DNA glycosylase	3	low	0.431347
mutM	Formamidopyrimidine-DNA glycosylase	3	high	1.42842
mutM	Formamidopyrimidine-DNA glycosylase	3	1:1 mix	1.02341
mutS	DNA mismatch repair protein MutS	3	high	0.631462
mutS	DNA mismatch repair protein MutS	3	low	1.04798
mutS	DNA mismatch repair protein MutS	3	1:1 mix	0.545259
mutT	8-oxo-dGTP diphosphatase	3	low	0.627216
mutT	8-oxo-dGTP diphosphatase	3	high	1.43155
mutT	8-oxo-dGTP diphosphatase	3	1:1 mix	0.764266
mutY	Adenine DNA glycosylase	2	low	0.224397
mutY	Adenine DNA glycosylase	2	high	1.15545
mutY	Adenine DNA glycosylase	2	1:1 mix	0.568585
nac	Nitrogen assimilation regulatory protein nac	3	low	-0.745055
nac	Nitrogen assimilation regulatory protein nac	3	high	-0.4742
nac	Nitrogen assimilation regulatory protein nac	3	1:1 mix	-0.686717
nadB	L-aspartate oxidase	4	high	-1.06677
nadB	L-aspartate oxidase	4	low	-0.550089
nadB	L-aspartate oxidase	4	1:1 mix	-0.230562
nadK	NAD kinase	1	1:1 mix	-0.00443046
nadK	NAD kinase	1	high	-0.523872
nadK	NAD kinase	1	low	0.0563643
nadR	Trifunctional NAD biosynthesis/regulator protein NadR	1	1:1 mix	-0.306336
nadR	Trifunctional NAD biosynthesis/regulator protein NadR	1	high	-0.68279
nadR	Trifunctional NAD biosynthesis/regulator protein NadR	1	low	-0.19688
nagA	N-acetylglucosamine-6-phosphate deacetylase	3	low	-0.00546122
nagA	N-acetylglucosamine-6-phosphate deacetylase	3	high	0.471218
nagA	N-acetylglucosamine-6-phosphate deacetylase	3	1:1 mix	0.231317
nagE	PTS system N-acetylglucosamine-specific EIICBA component	2	low	0.240493
nagE	PTS system N-acetylglucosamine-specific EIICBA component	2	high	1.05775
nagE	PTS system N-acetylglucosamine-specific EIICBA component	2	1:1 mix	0.361676
nanM	N-acetylneuraminate epimerase	1	1:1 mix	-0.331947
nanM	N-acetylneuraminate epimerase	1	high	-0.890413
nanM	N-acetylneuraminate epimerase	1	low	-0.567384
narG	Respiratory nitrate reductase 1 alpha chain	3	low	-0.0861248
narG	Respiratory nitrate reductase 1 alpha chain	3	high	0.623825
narG	Respiratory nitrate reductase 1 alpha chain	3	1:1 mix	0.0573861
narH	Respiratory nitrate reductase 1 beta chain	2	low	0.179443
narH	Respiratory nitrate reductase 1 beta chain	2	high	0.975689
narH	Respiratory nitrate reductase 1 beta chain	2	1:1 mix	0.507228
narJ	Nitrate reductase molybdenum cofactor assembly chaperone NarJ	3	low	0.884324
narJ	Nitrate reductase molybdenum cofactor assembly chaperone NarJ	3	high	2.2492
narJ	Nitrate reductase molybdenum cofactor assembly chaperone NarJ	3	1:1 mix	1.34364
narU	Nitrate/nitrite transporter NarU	1	1:1 mix	-0.876208
narU	Nitrate/nitrite transporter NarU	1	high	-0.982792
narU	Nitrate/nitrite transporter NarU	1	low	-0.785777
narV	Respiratory nitrate reductase 2 gamma chain	4	low	-0.793325
narV	Respiratory nitrate reductase 2 gamma chain	4	high	-0.655579
narV	Respiratory nitrate reductase 2 gamma chain	4	1:1 mix	-0.851034
narW	Probable nitrate reductase molybdenum cofactor assembly chaperone NarW	4	high	-0.863823
narW	Probable nitrate reductase molybdenum cofactor assembly chaperone NarW	4	low	-0.856802
narW	Probable nitrate reductase molybdenum cofactor assembly chaperone NarW	4	1:1 mix	-0.921593
narY	Respiratory nitrate reductase 2 beta chain	1	1:1 mix	-0.798981
narY	Respiratory nitrate reductase 2 beta chain	1	high	-0.887135
narY	Respiratory nitrate reductase 2 beta chain	1	low	-0.79059
narZ	Respiratory nitrate reductase 2 alpha chain	1	1:1 mix	-0.696687
narZ	Respiratory nitrate reductase 2 alpha chain	1	low	-0.691594
narZ	Respiratory nitrate reductase 2 alpha chain	1	high	-0.584369
ndh	Type II NADH:quinone oxidoreductase	2	low	0.357933
ndh	Type II NADH:quinone oxidoreductase	2	high	1.0268
ndh	Type II NADH:quinone oxidoreductase	2	1:1 mix	0.720581
nfi	Endonuclease V	1	1:1 mix	-0.204966
nfi	Endonuclease V	1	high	-0.792515
nfi	Endonuclease V	1	low	0.00681742
nfrB	Bacteriophage adsorption protein B	1	1:1 mix	-0.567352
nfrB	Bacteriophage adsorption protein B	1	high	-0.605418
nfrB	Bacteriophage adsorption protein B	1	low	-0.356029
nfsA	Oxygen-insensitive NADPH nitroreductase	2	low	0.394337
nfsA	Oxygen-insensitive NADPH nitroreductase	2	high	0.749925
nfsA	Oxygen-insensitive NADPH nitroreductase	2	1:1 mix	0.467171
nhaA	Na(+)/H(+) antiporter NhaA	3	low	-0.188349
nhaA	Na(+)/H(+) antiporter NhaA	3	high	0.440143
nhaA	Na(+)/H(+) antiporter NhaA	3	1:1 mix	0.149759
nhaR	Transcriptional activator protein NhaR	1	1:1 mix	-0.438459
nhaR	Transcriptional activator protein NhaR	1	high	-0.689746
nhaR	Transcriptional activator protein NhaR	1	low	-0.282966
nlpA	Lipoprotein 28	1	1:1 mix	-0.1982
nlpA	Lipoprotein 28	1	high	-0.710979
nlpA	Lipoprotein 28	1	low	-0.0536941
nlpD	Murein hydrolase activator NlpD	2	low	0.569189
nlpD	Murein hydrolase activator NlpD	2	high	0.692548
nlpD	Murein hydrolase activator NlpD	2	1:1 mix	0.488063
nlpE	Lipoprotein NlpE	2	low	0.115021
nlpE	Lipoprotein NlpE	2	high	0.541225
nlpE	Lipoprotein NlpE	2	1:1 mix	0.339034
nnr	Bifunctional NAD(P)H-hydrate repair enzyme Nnr	2	low	0.222559
nnr	Bifunctional NAD(P)H-hydrate repair enzyme Nnr	2	high	0.585705
nnr	Bifunctional NAD(P)H-hydrate repair enzyme Nnr	2	1:1 mix	0.272689
npr	Phosphocarrier protein NPr	1	1:1 mix	-0.336017
npr	Phosphocarrier protein NPr	1	high	-0.713148
npr	Phosphocarrier protein NPr	1	low	-0.37079
nrdA	Ribonucleoside-diphosphate reductase 1 subunit alpha	2	high	0.660041
nrdA	Ribonucleoside-diphosphate reductase 1 subunit alpha	2	low	0.787396
nrdA	Ribonucleoside-diphosphate reductase 1 subunit alpha	2	1:1 mix	0.635327
nrdE	Ribonucleoside-diphosphate reductase 2 subunit alpha	1	1:1 mix	-0.216746
nrdE	Ribonucleoside-diphosphate reductase 2 subunit alpha	1	high	-0.317245
nrdE	Ribonucleoside-diphosphate reductase 2 subunit alpha	1	low	0.0362826
nrdF	Ribonucleoside-diphosphate reductase 2 subunit beta	1	1:1 mix	-0.415851
nrdF	Ribonucleoside-diphosphate reductase 2 subunit beta	1	high	-0.752503
nrdF	Ribonucleoside-diphosphate reductase 2 subunit beta	1	low	-0.0499158
nrdG	Anaerobic ribonucleoside-triphosphate reductase-activating protein	4	high	-0.684125
nrdG	Anaerobic ribonucleoside-triphosphate reductase-activating protein	4	low	-0.520819
nrdG	Anaerobic ribonucleoside-triphosphate reductase-activating protein	4	1:1 mix	-0.813064
nsrR	HTH-type transcriptional repressor NsrR	1	1:1 mix	-0.452052
nsrR	HTH-type transcriptional repressor NsrR	1	high	-0.685331
nsrR	HTH-type transcriptional repressor NsrR	1	low	-0.0769345
nudC	NAD-capped RNA hydrolase NudC	1	1:1 mix	-0.300297
nudC	NAD-capped RNA hydrolase NudC	1	high	-0.826625
nudC	NAD-capped RNA hydrolase NudC	1	low	-0.0498842
nudK	GDP-mannose pyrophosphatase	3	high	0.74529
nudK	GDP-mannose pyrophosphatase	3	low	0.894084
nudK	GDP-mannose pyrophosphatase	3	1:1 mix	0.620368
nudL	Uncharacterized Nudix hydrolase NudL	1	1:1 mix	-0.401431
nudL	Uncharacterized Nudix hydrolase NudL	1	high	-0.841598
nudL	Uncharacterized Nudix hydrolase NudL	1	low	0.0464316
nuoA	NADH-quinone oxidoreductase subunit A	2	high	0.271184
nuoA	NADH-quinone oxidoreductase subunit A	2	low	0.501605
nuoA	NADH-quinone oxidoreductase subunit A	2	1:1 mix	0.422123
nuoB	NADH-quinone oxidoreductase subunit B	2	high	0.482906
nuoB	NADH-quinone oxidoreductase subunit B	2	low	0.59963
nuoB	NADH-quinone oxidoreductase subunit B	2	1:1 mix	0.457462
nuoC	NADH-quinone oxidoreductase subunit C/D	2	high	0.511039
nuoC	NADH-quinone oxidoreductase subunit C/D	2	low	0.57975
nuoC	NADH-quinone oxidoreductase subunit C/D	2	1:1 mix	0.468367
nuoE	NADH-quinone oxidoreductase subunit E	2	low	0.651584
nuoE	NADH-quinone oxidoreductase subunit E	2	high	0.674007
nuoE	NADH-quinone oxidoreductase subunit E	2	1:1 mix	0.560941
nuoF	NADH-quinone oxidoreductase subunit F	2	high	0.554224
nuoF	NADH-quinone oxidoreductase subunit F	2	low	0.614989
nuoF	NADH-quinone oxidoreductase subunit F	2	1:1 mix	0.583637
nuoG	NADH-quinone oxidoreductase subunit G	2	low	0.438802
nuoG	NADH-quinone oxidoreductase subunit G	2	high	0.519874
nuoG	NADH-quinone oxidoreductase subunit G	2	1:1 mix	0.496145
nuoH	NADH-quinone oxidoreductase subunit H	2	low	0.428979
nuoH	NADH-quinone oxidoreductase subunit H	2	high	0.580372
nuoH	NADH-quinone oxidoreductase subunit H	2	1:1 mix	0.628366
nuoI	NADH-quinone oxidoreductase subunit I	2	low	0.500007
[truncated: 2,690 more rows]
